# Supplementary material for: K2S2O8 mediated C-3 arylation of quinoxalin-2(1H)-ones under metal-, photocatalyst- and light-free conditions
Source: Royal Society of Chemistry journal article supplement (doi:10.1039/d0ra00013b), 2020-01-01

## Supporting Information

### **K<sub>2</sub>S<sub>2</sub>O<sub>8</sub> Mediated C-3 Arylation of Quinoxalin-2(1H)-ones under Metal-, Photocatalyst- and Light-free conditions**

Nibedita Baruah Dutta,<sup>a,b,c</sup> Mayurakhi Bhuyan,<sup>a,b</sup> and Gakul Baishya<sup>a,b\*</sup>

#### **CONTENTS:**

1. <sup>1</sup>H NMR and <sup>13</sup>C NMR Spectra of all synthesized compounds 2-37

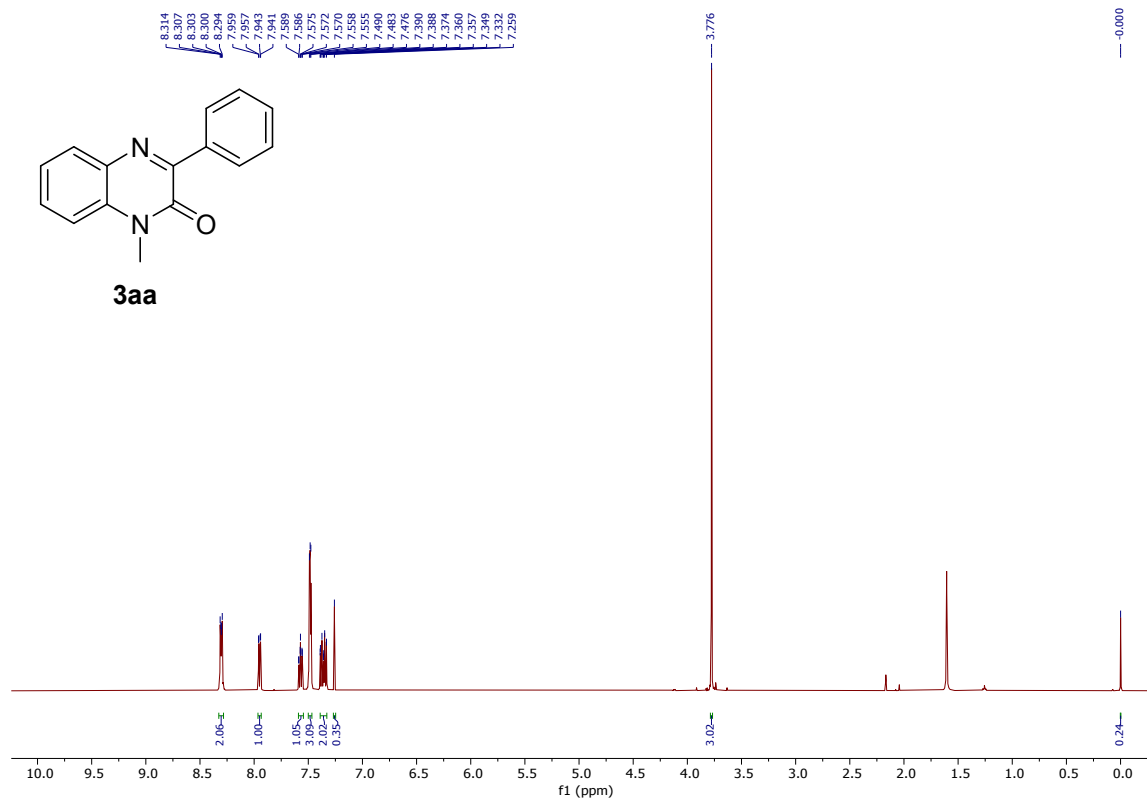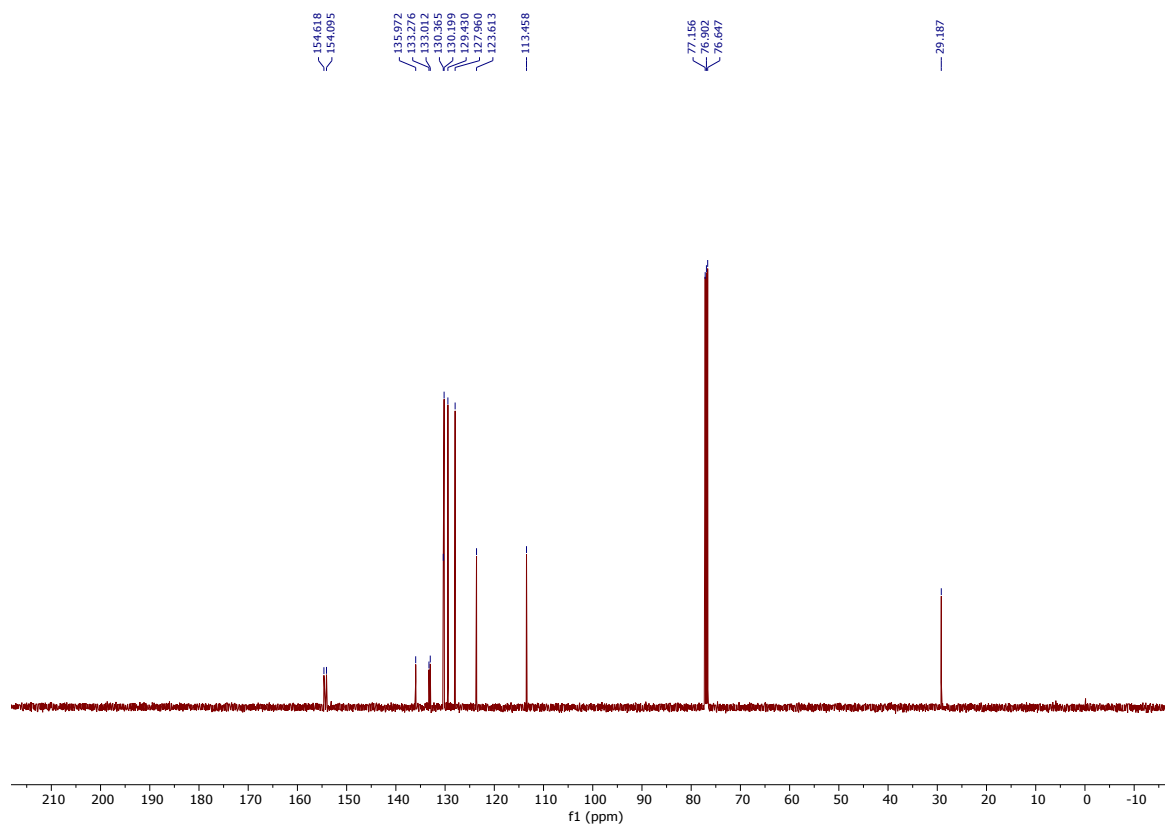

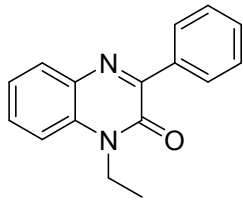

**3ba**

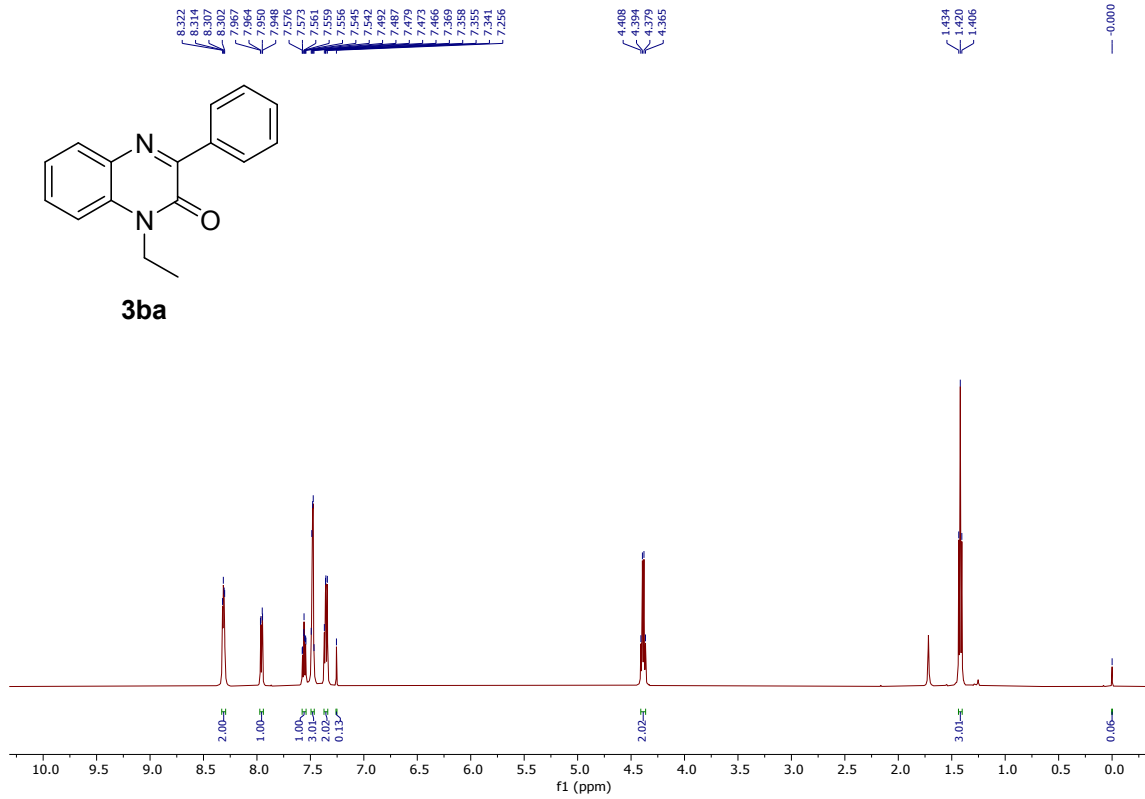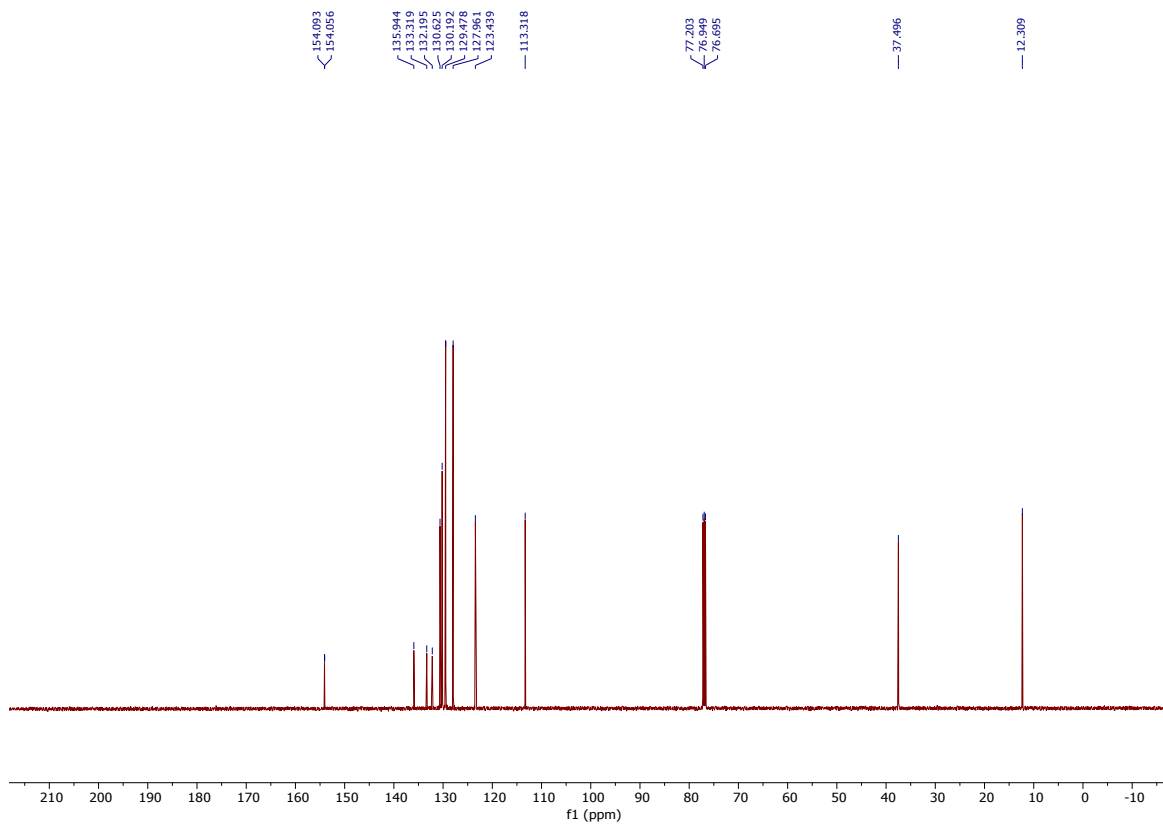

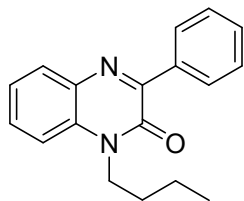

**3ca**

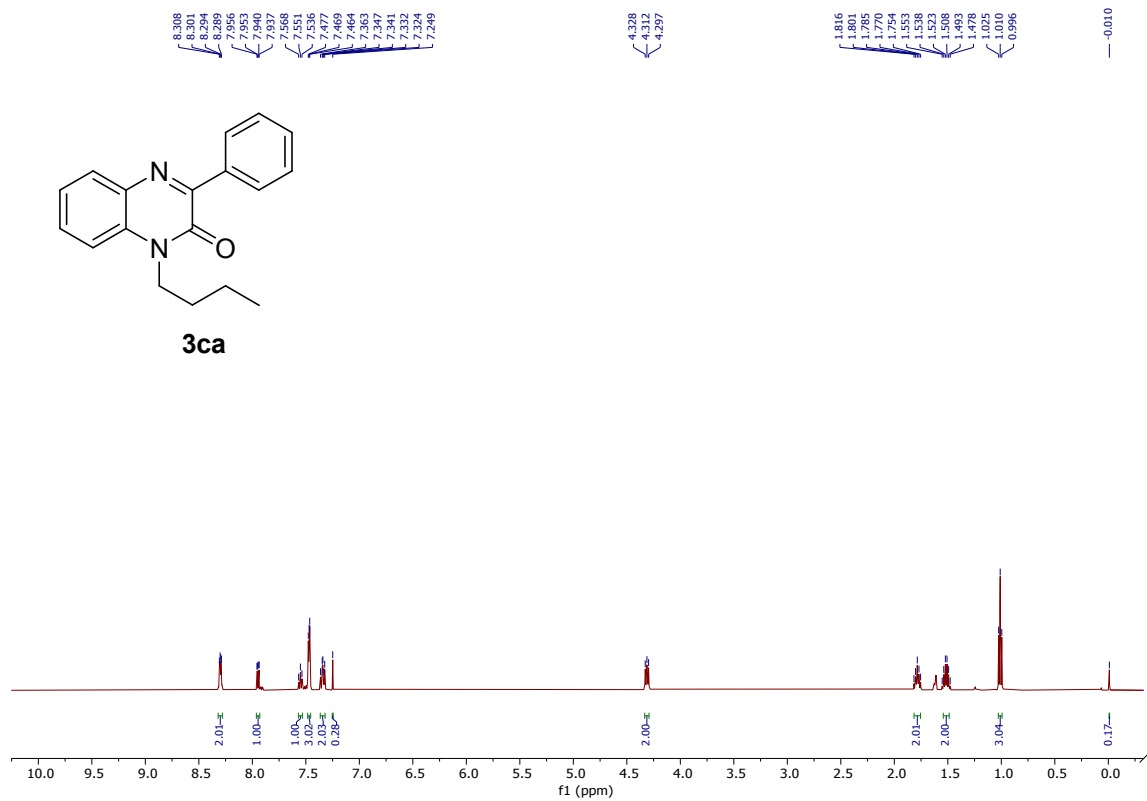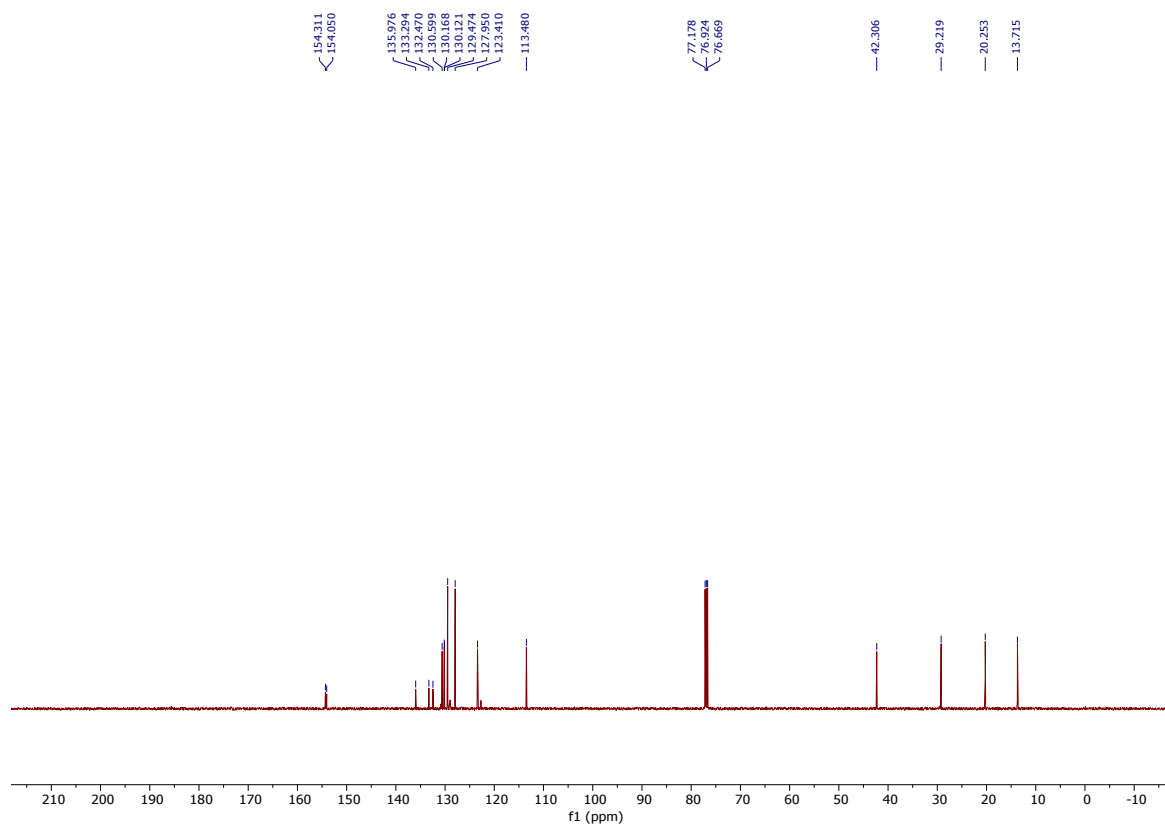

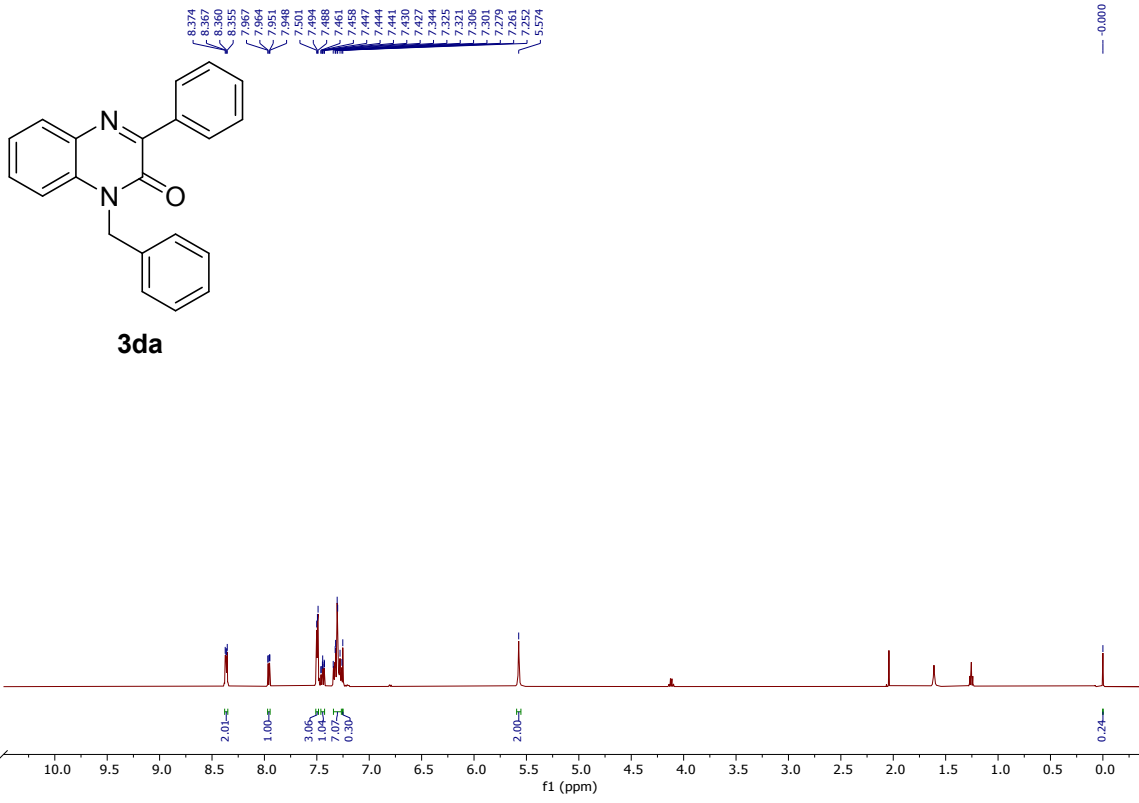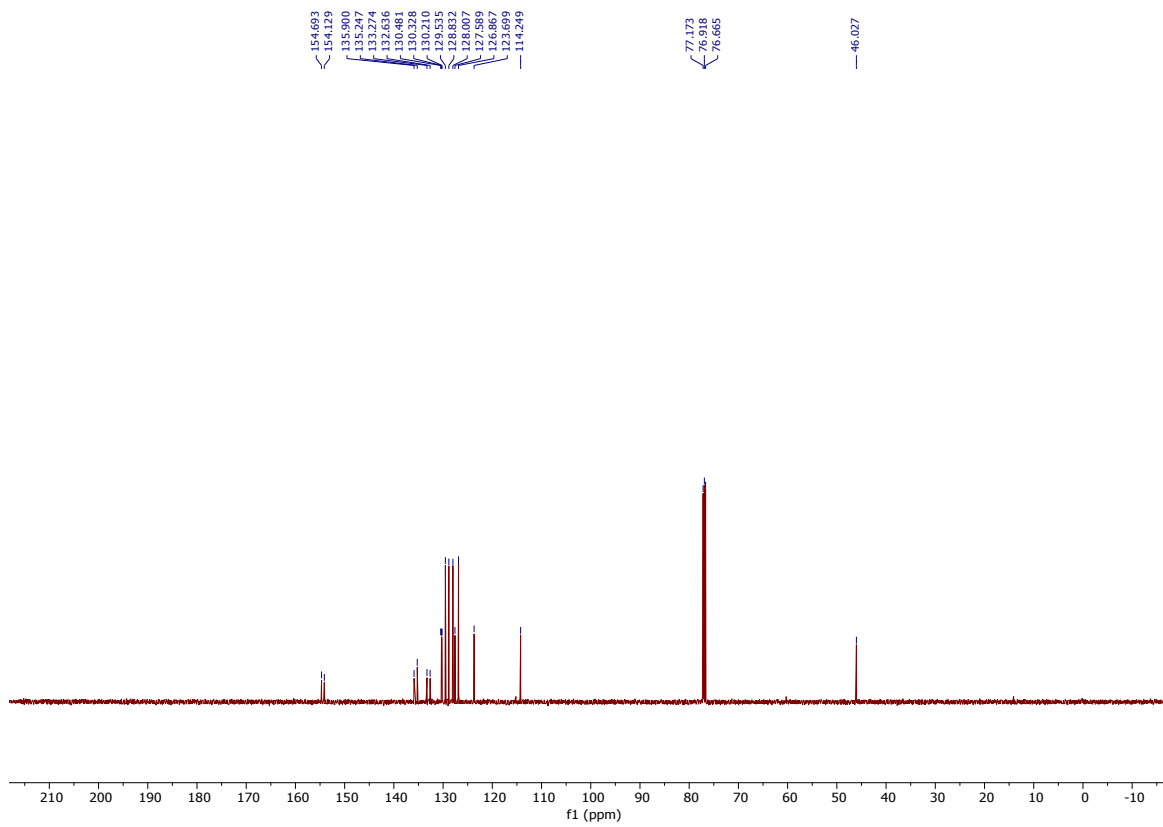

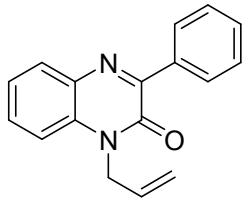

**3ea**

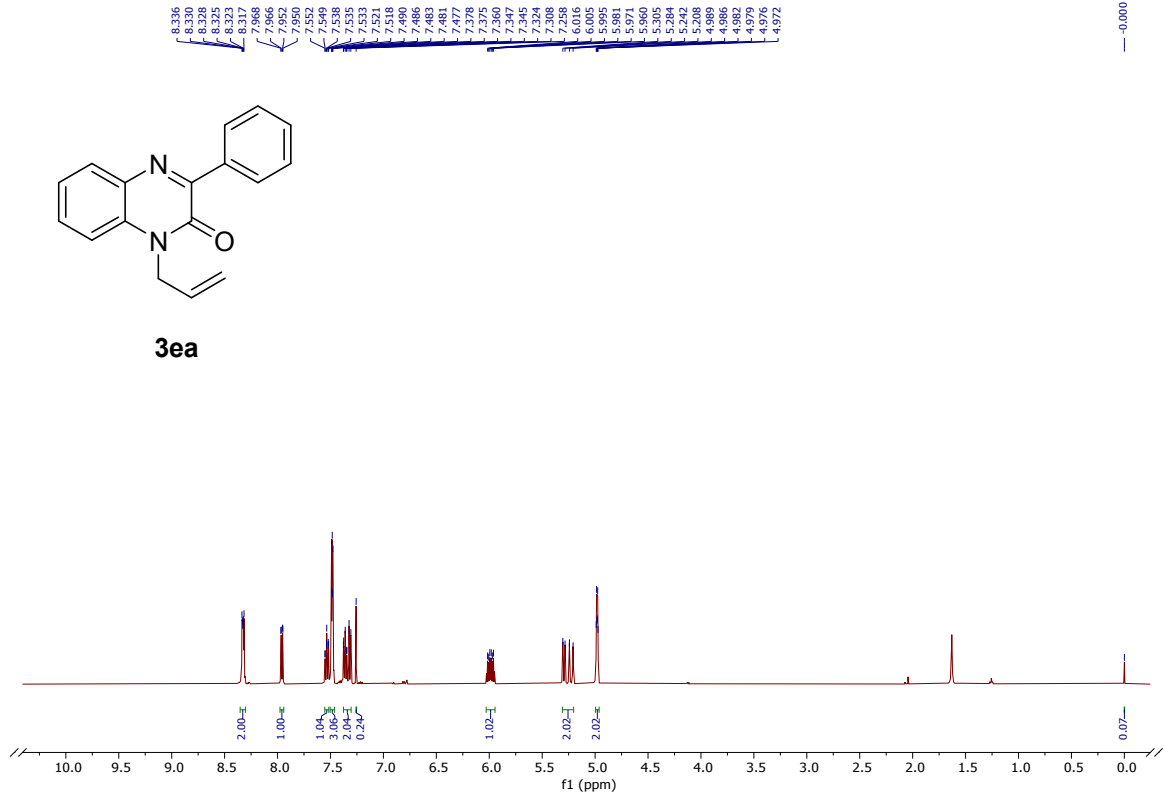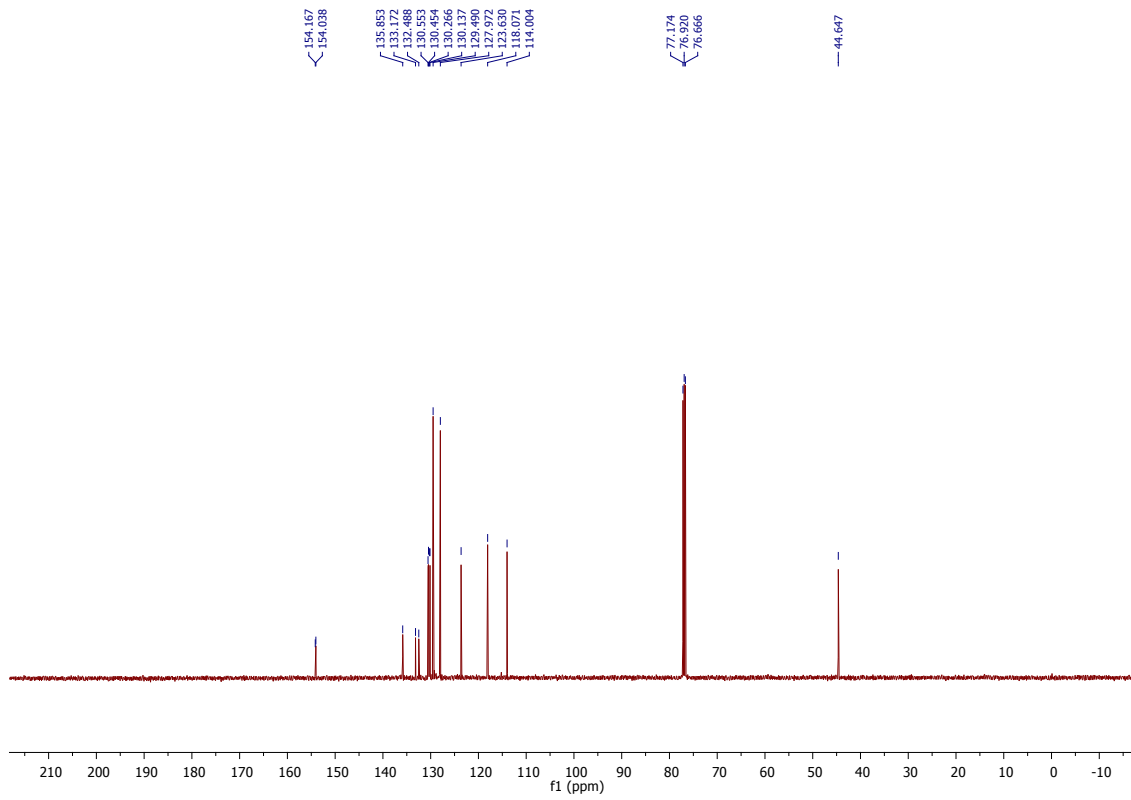

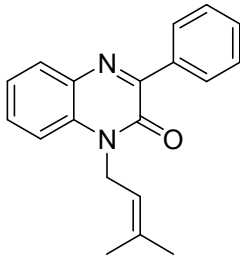

**3fa**

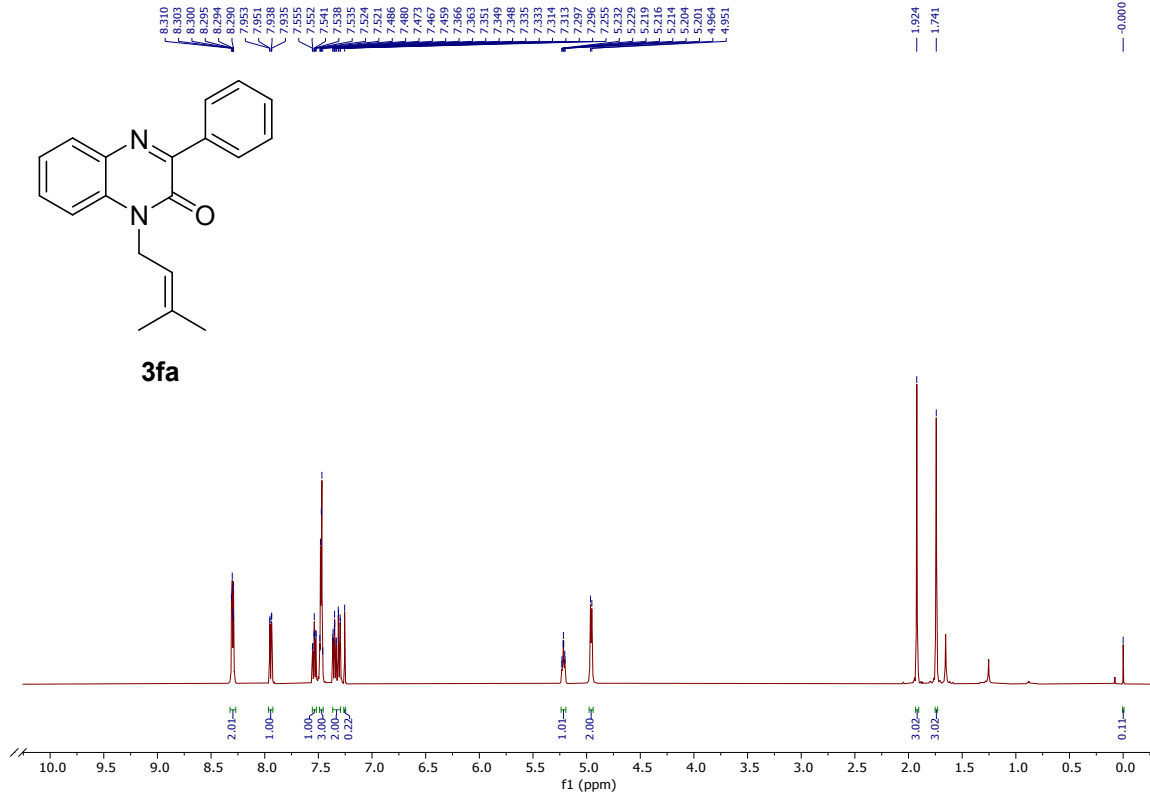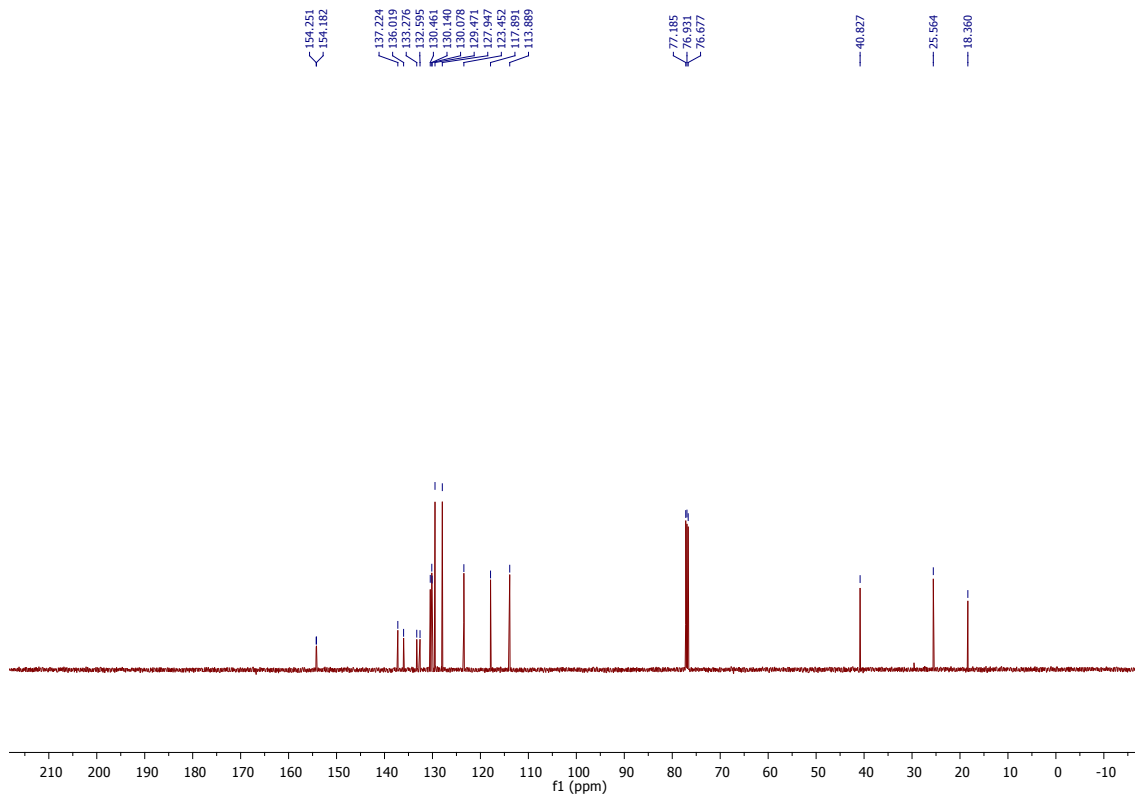

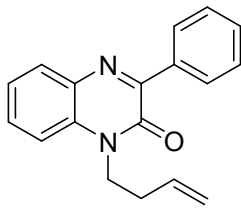

**3ga**

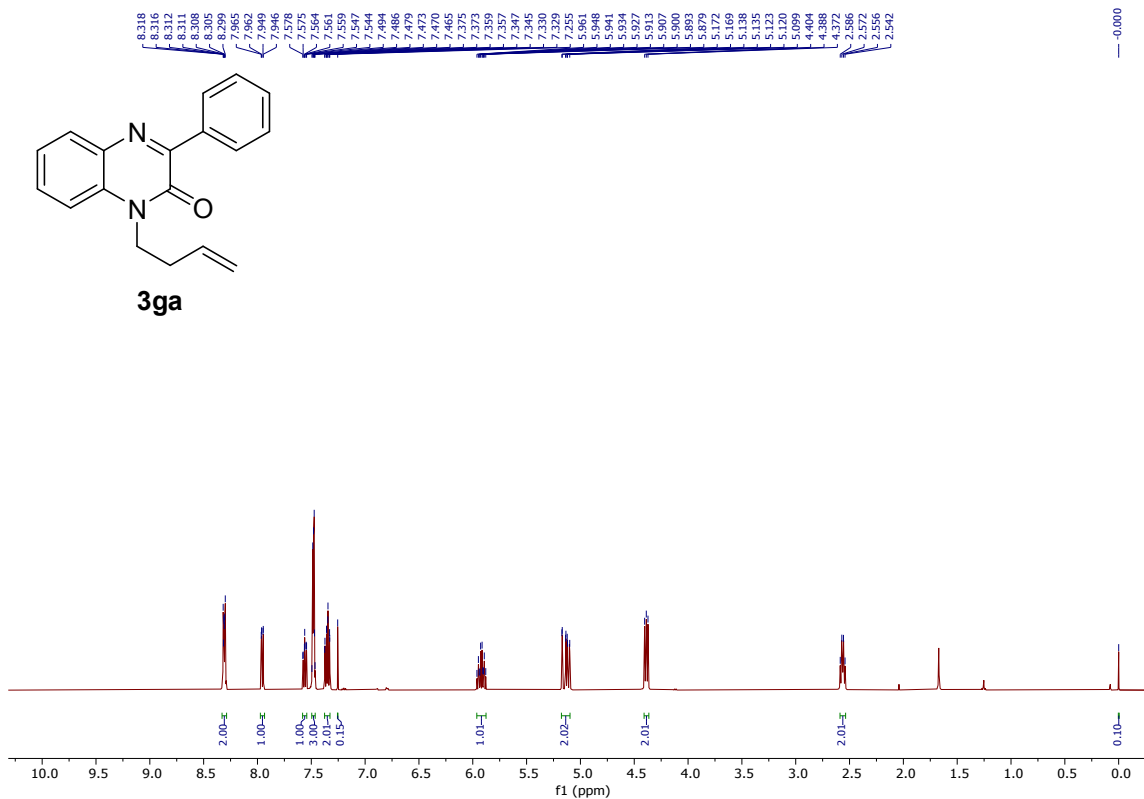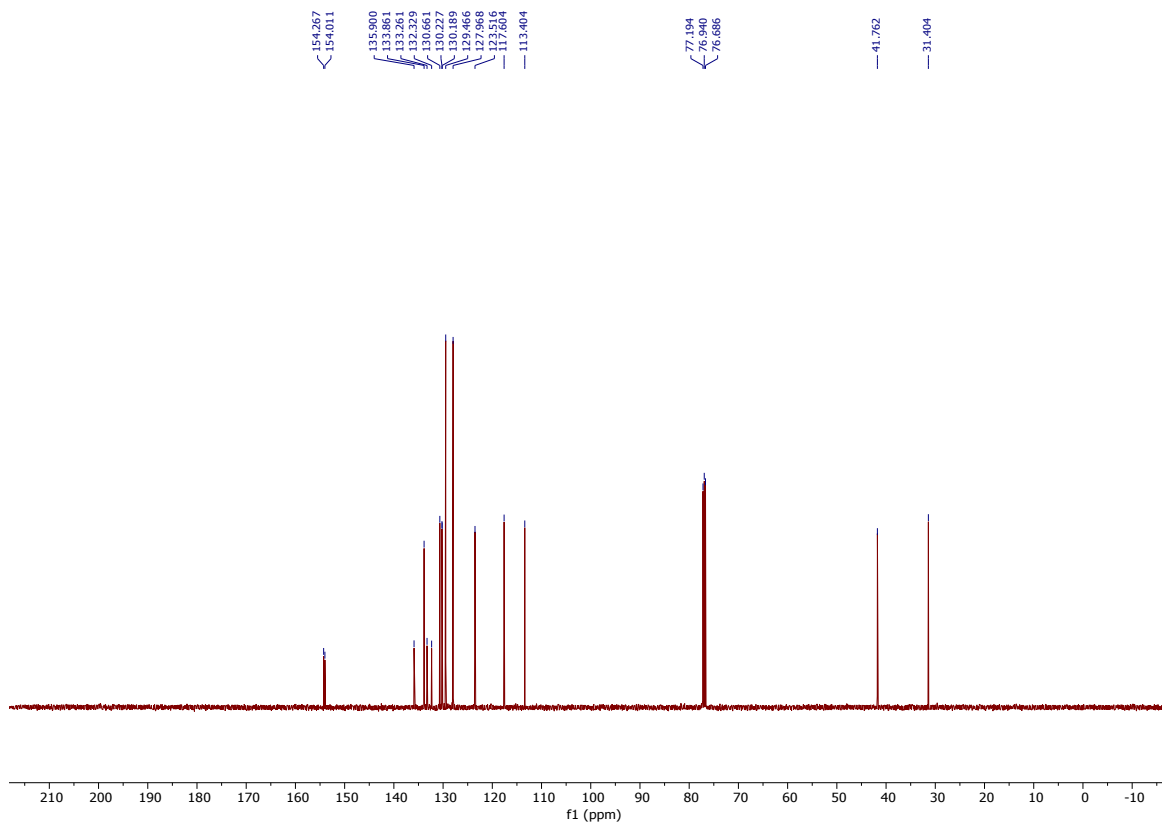



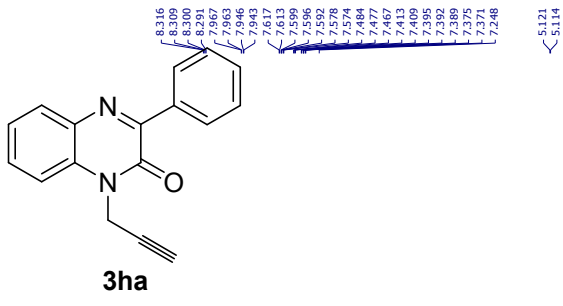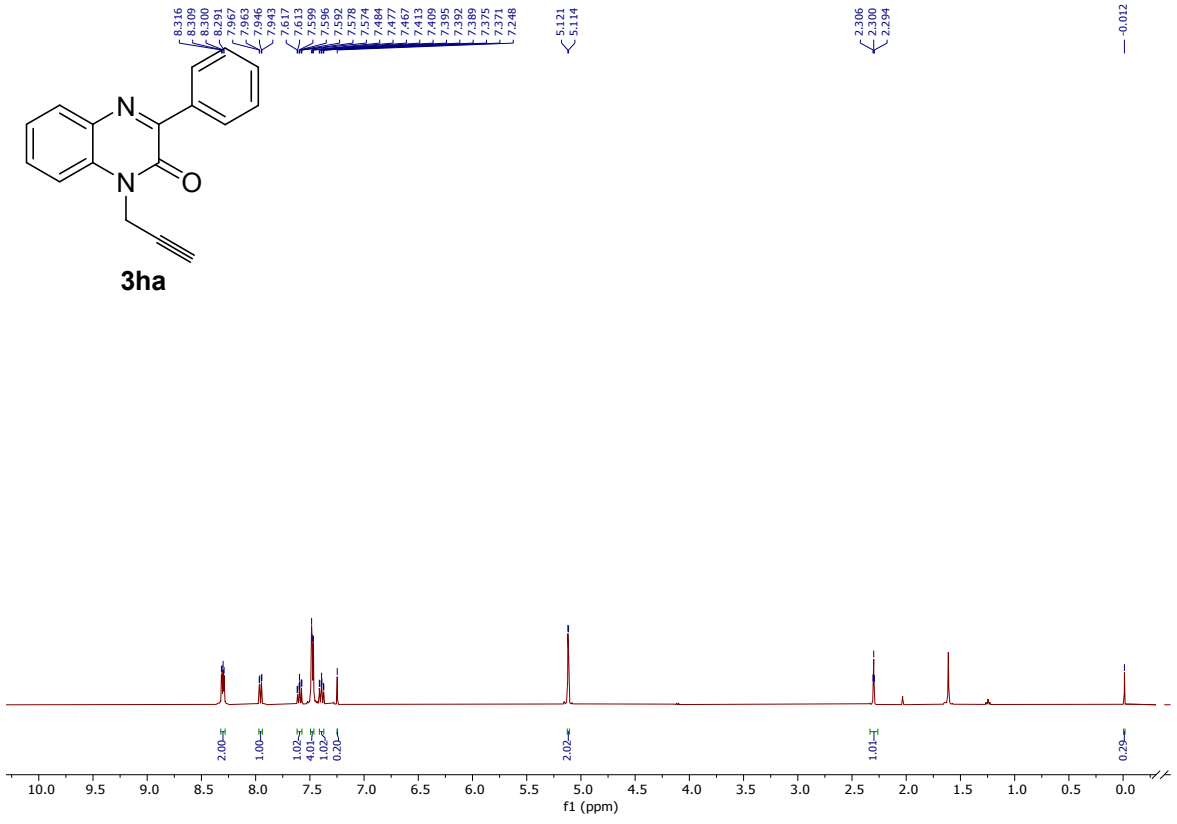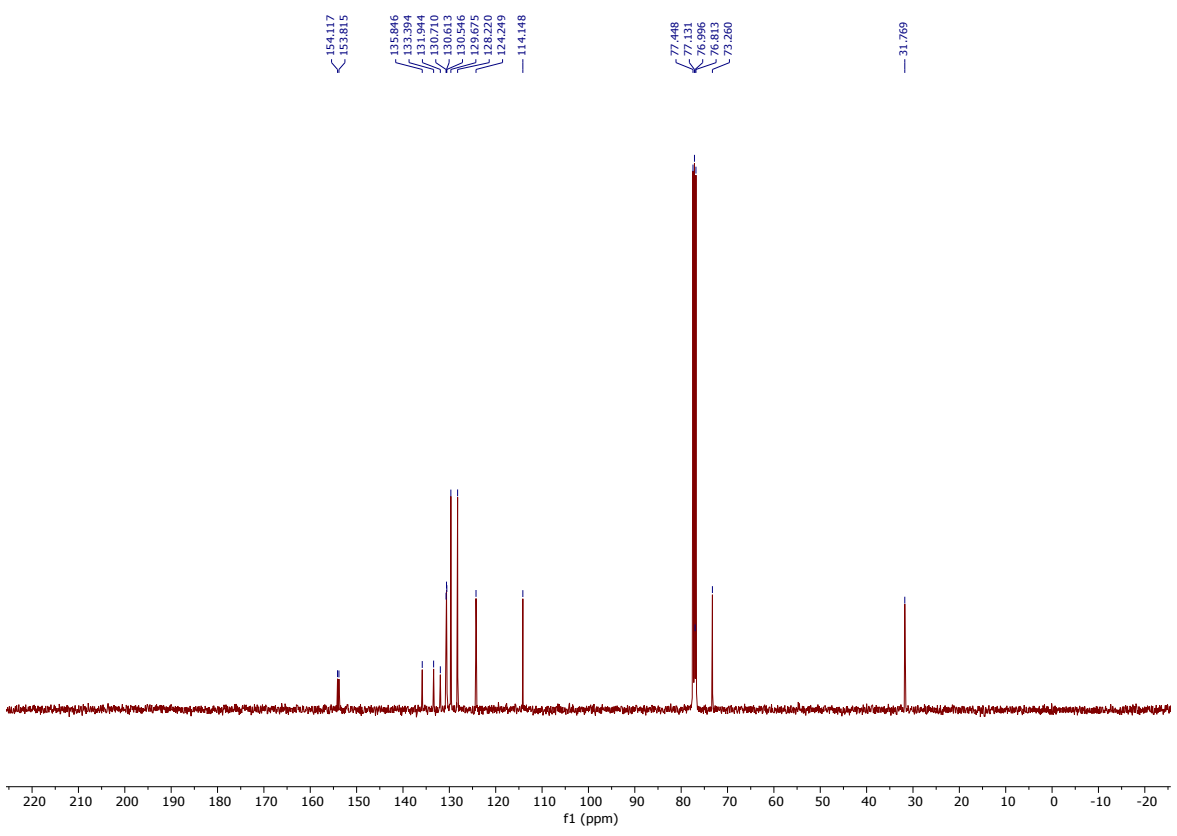

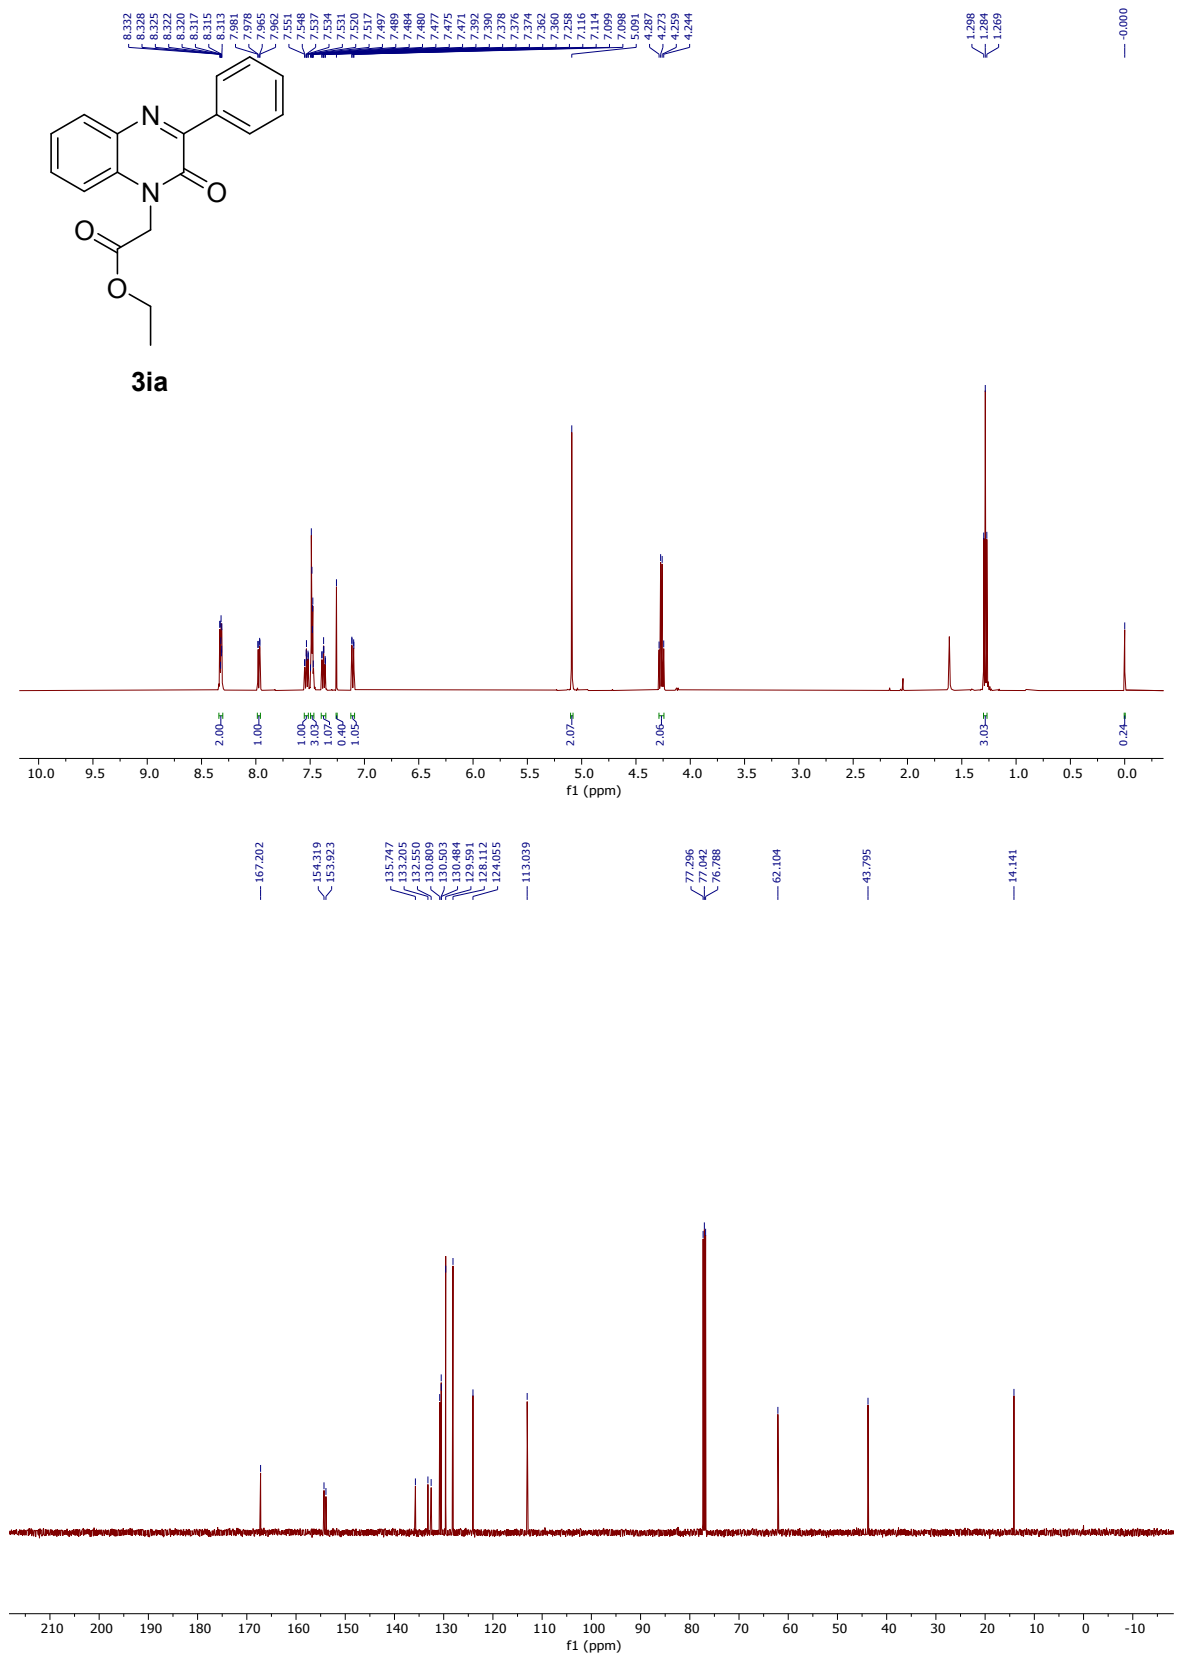

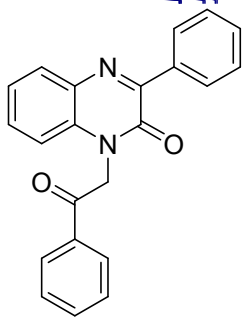

**3ja**

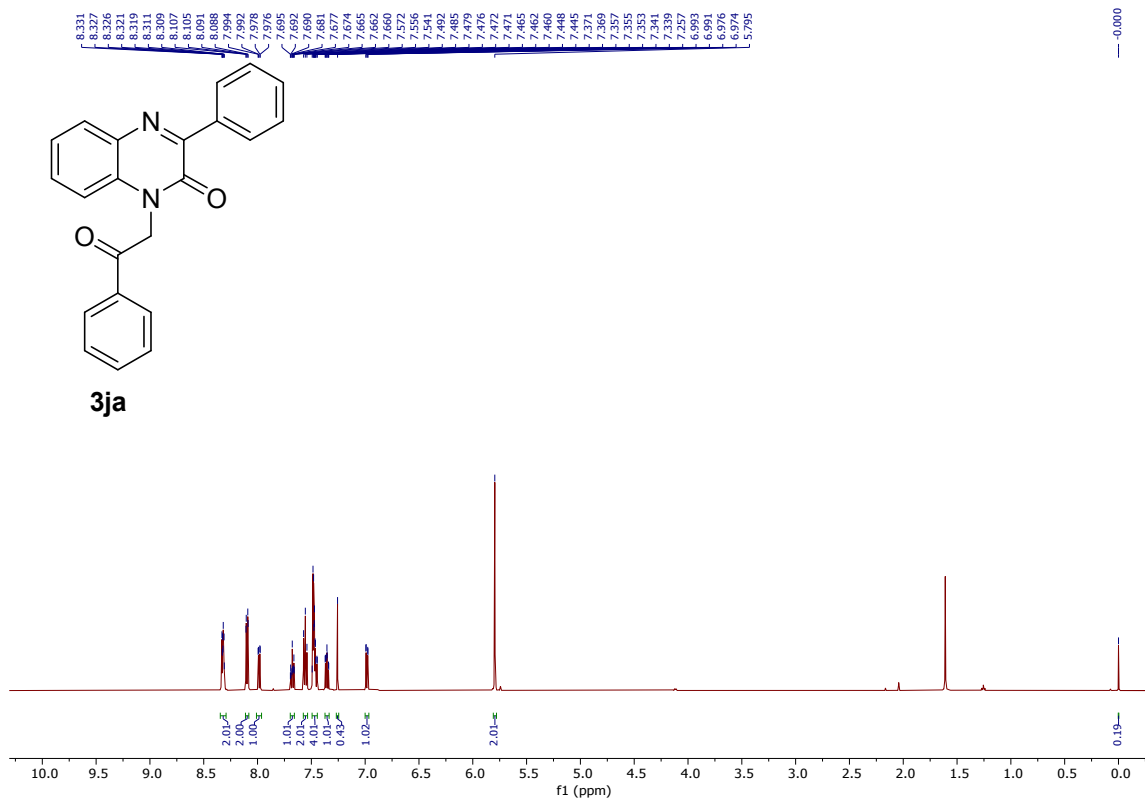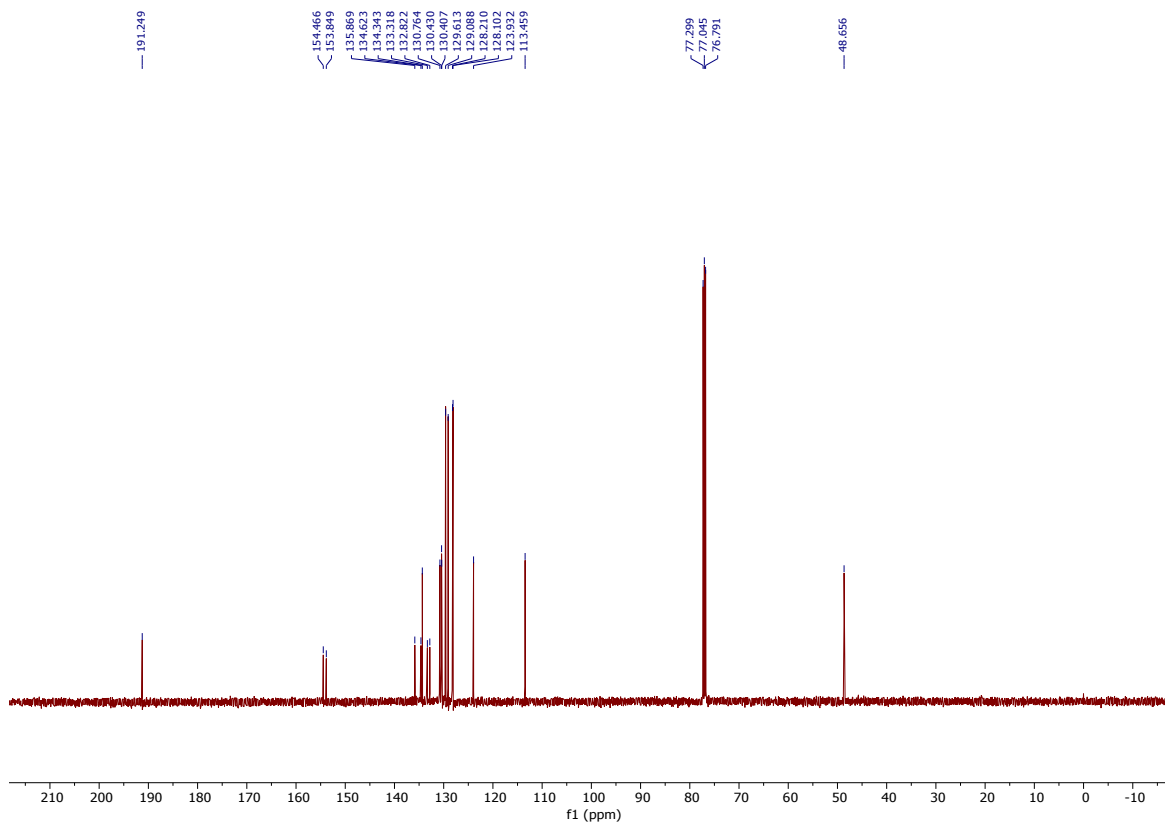

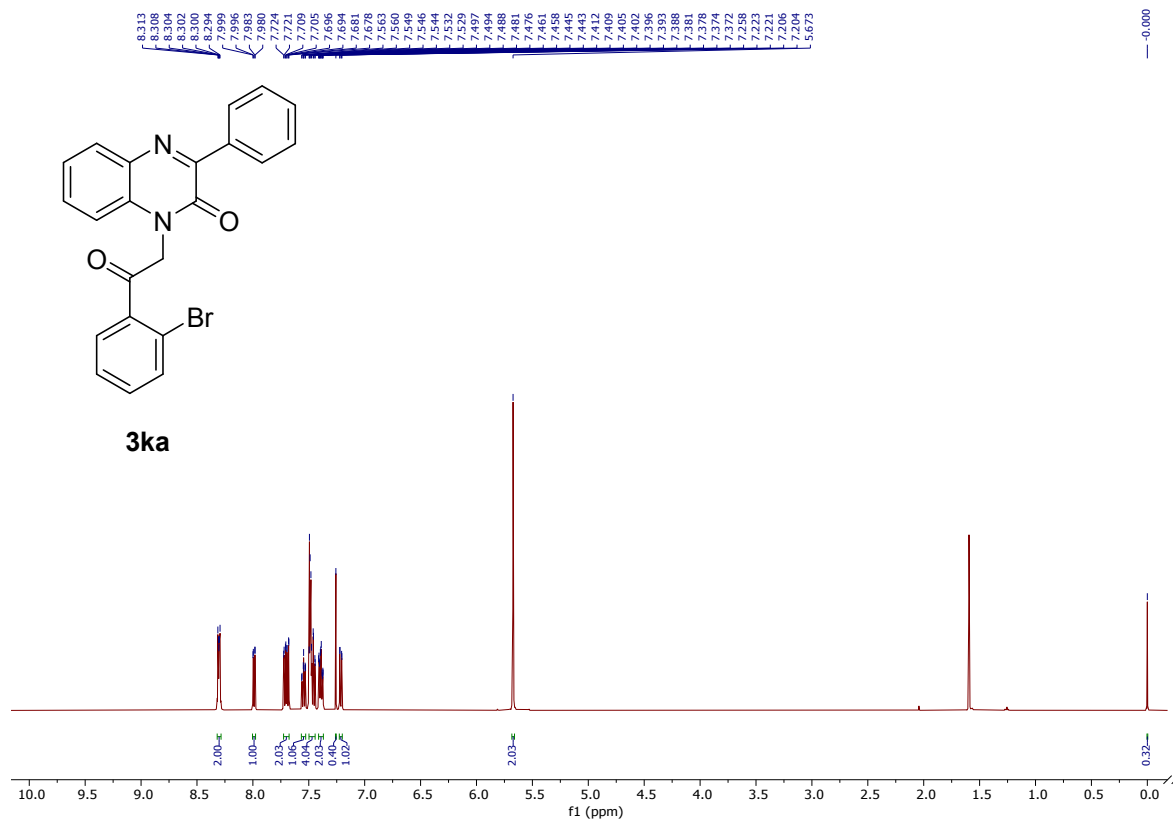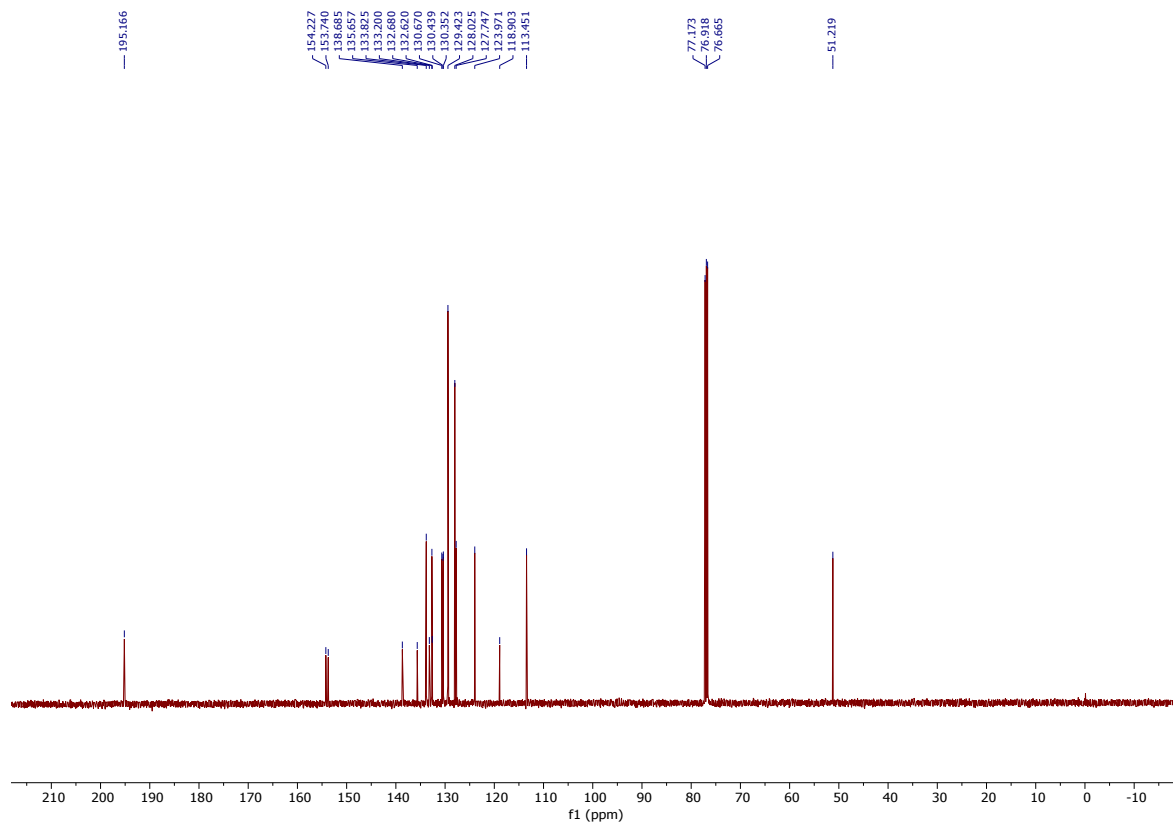

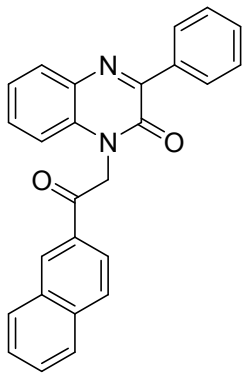

3la

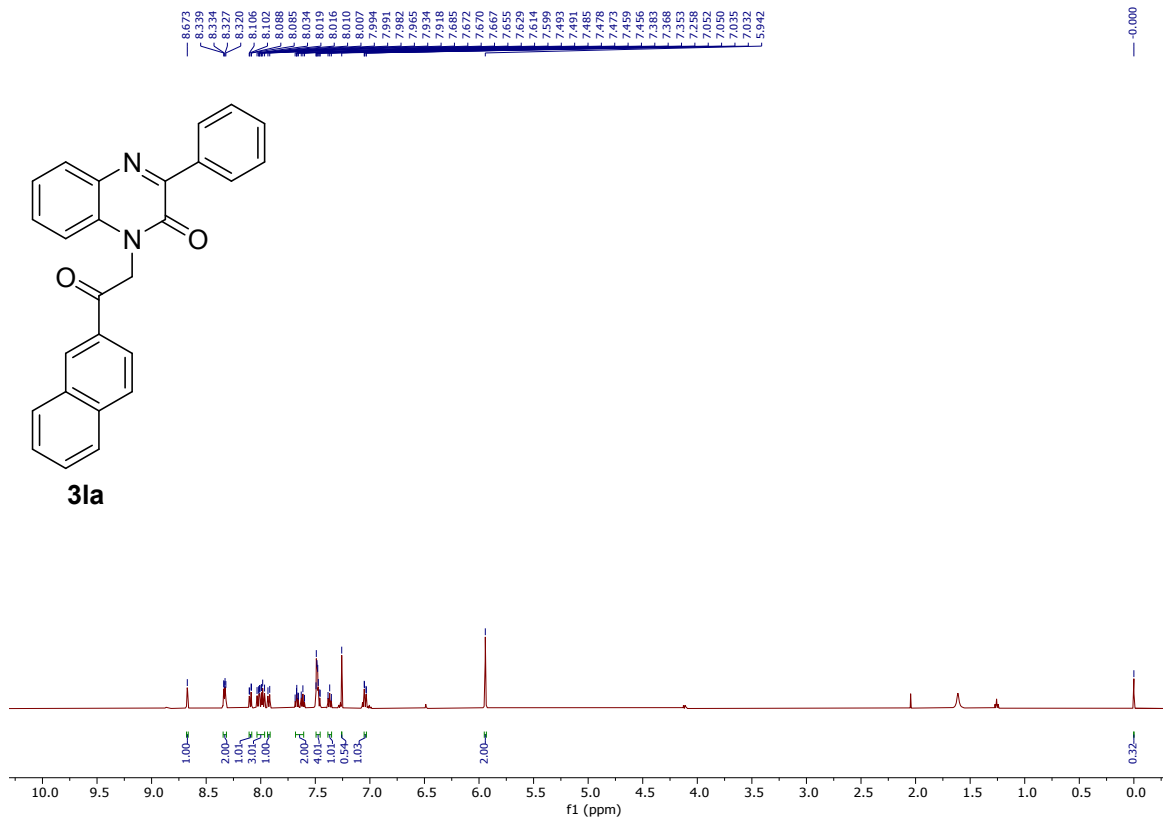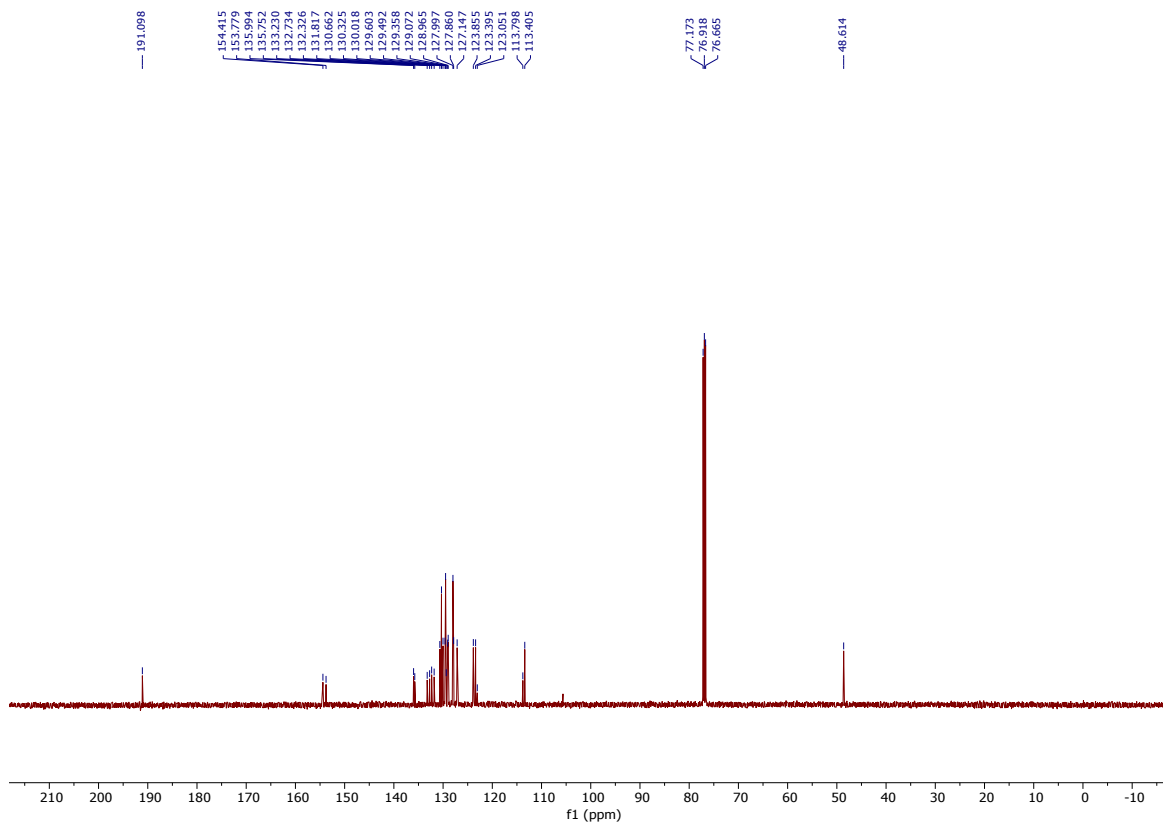

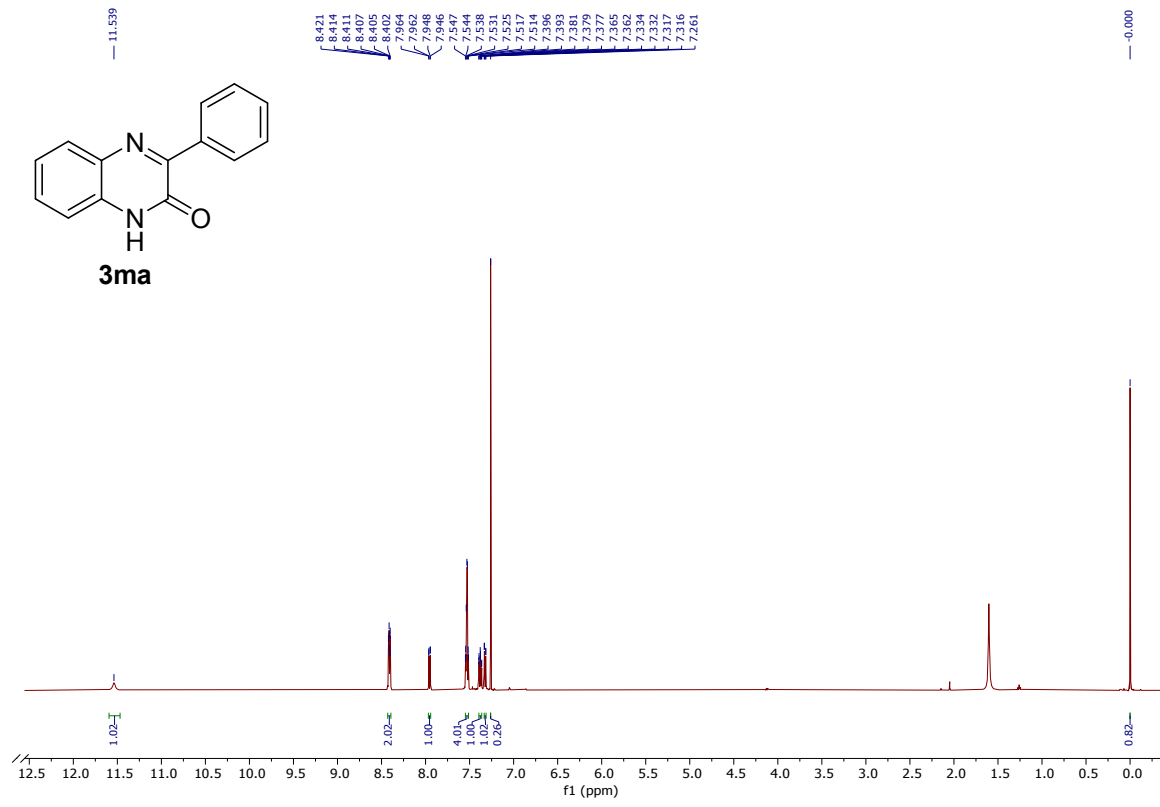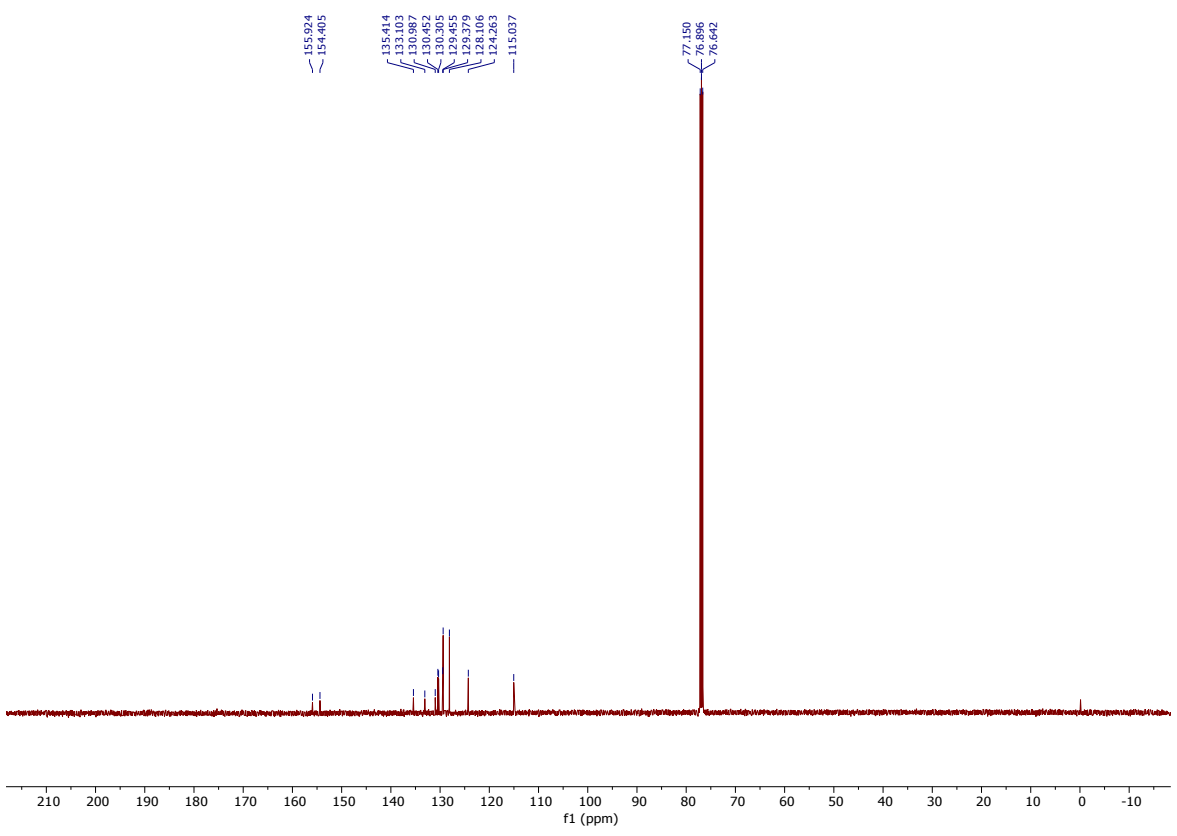

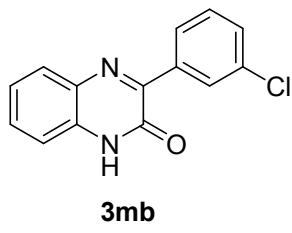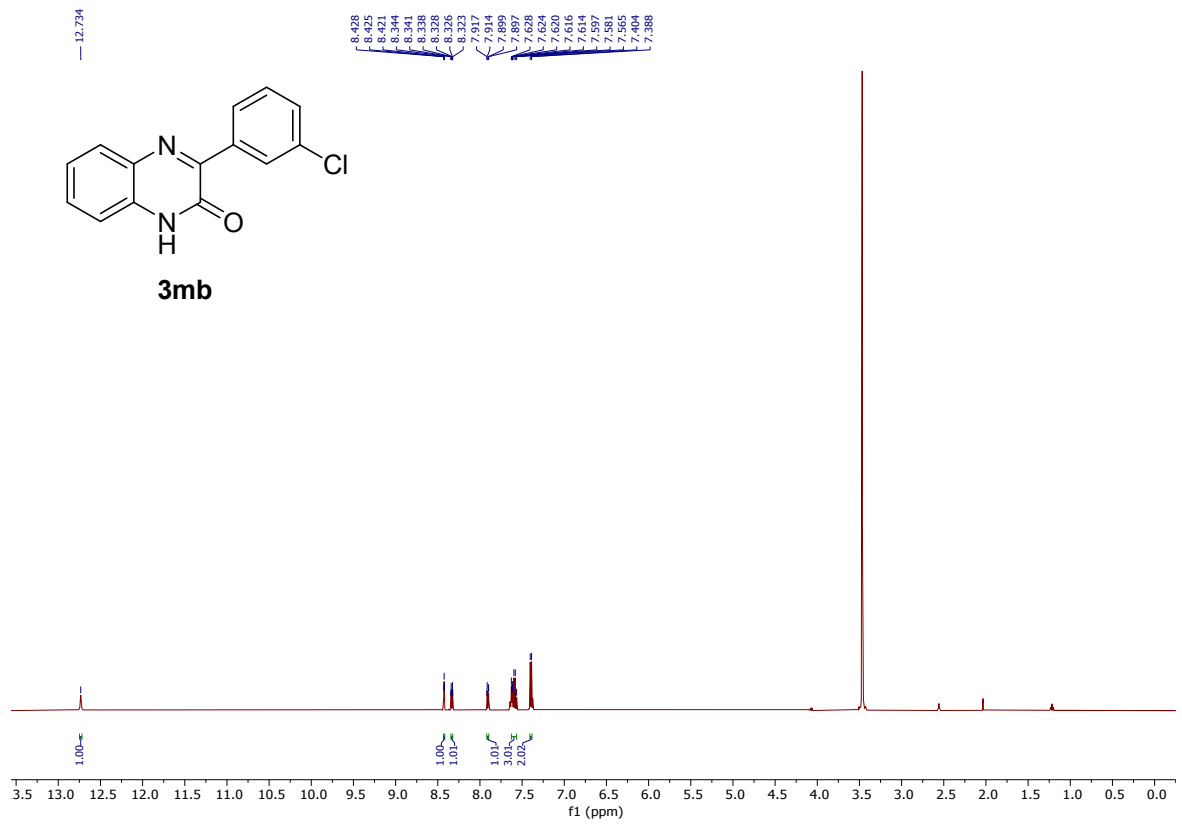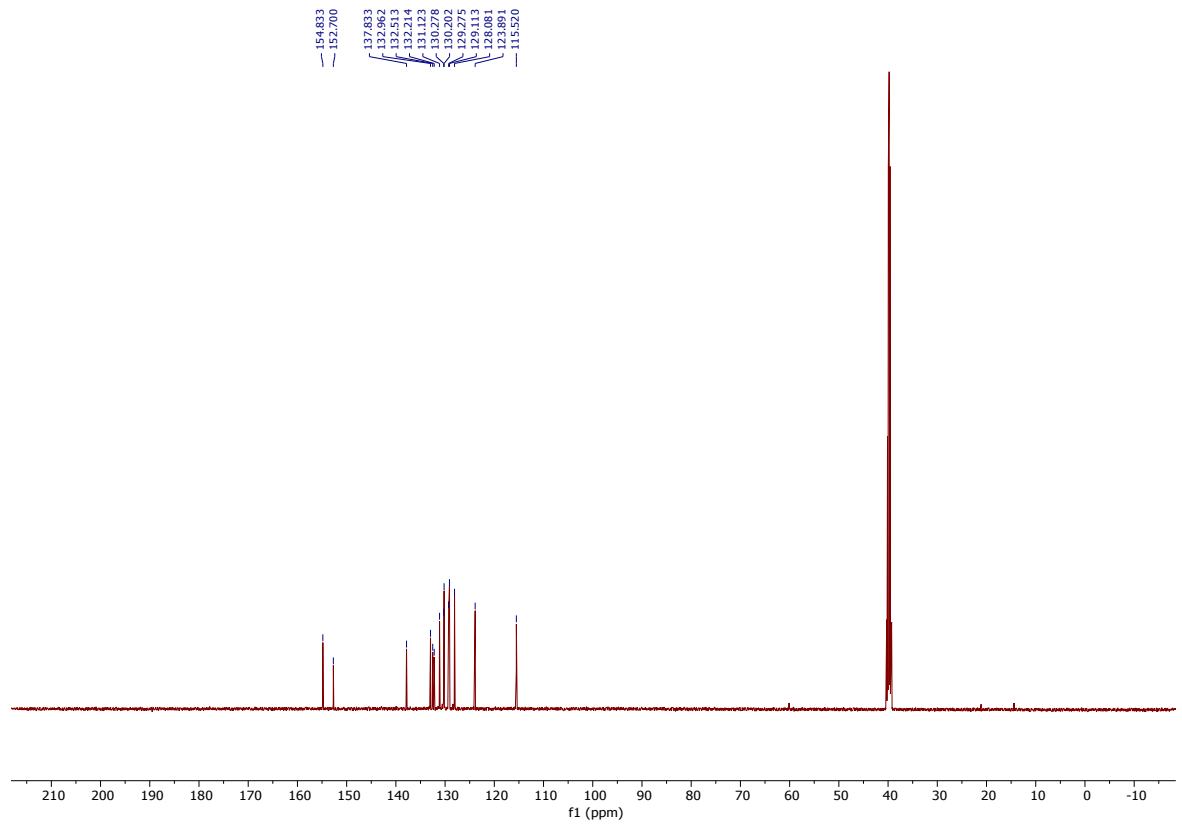

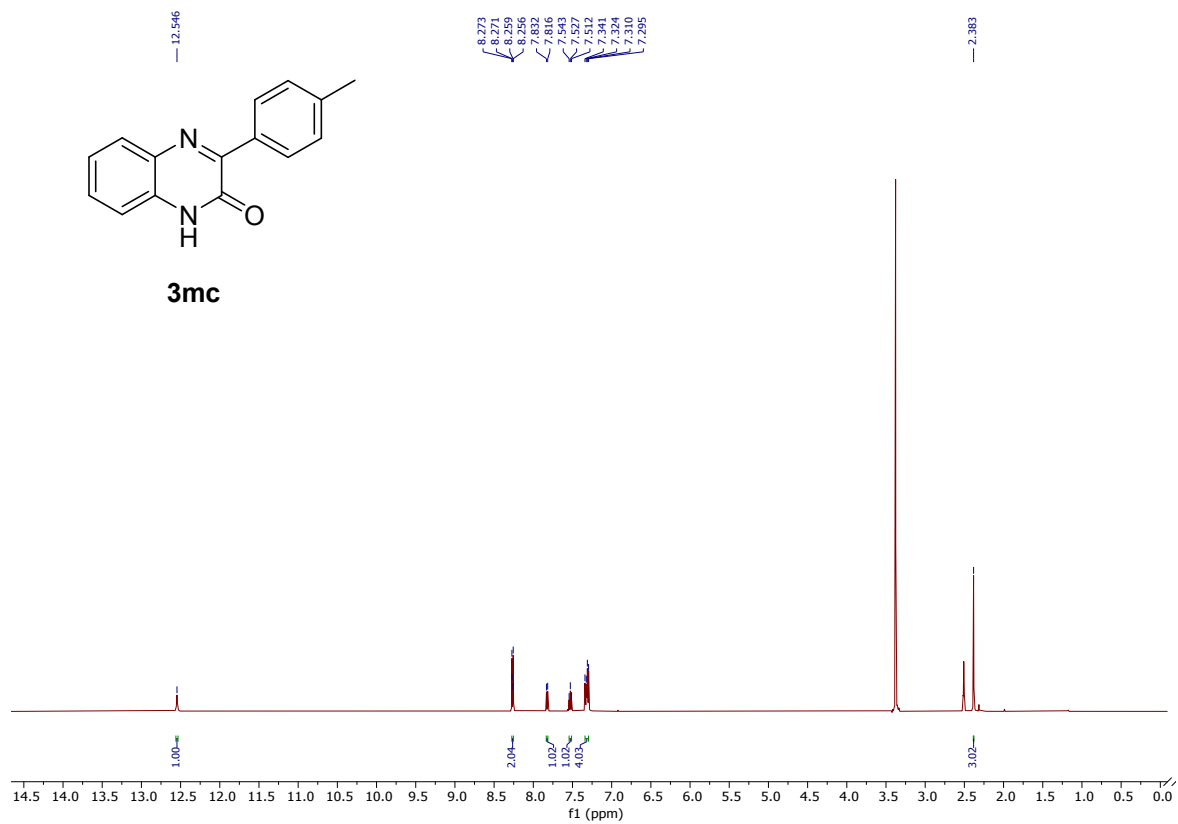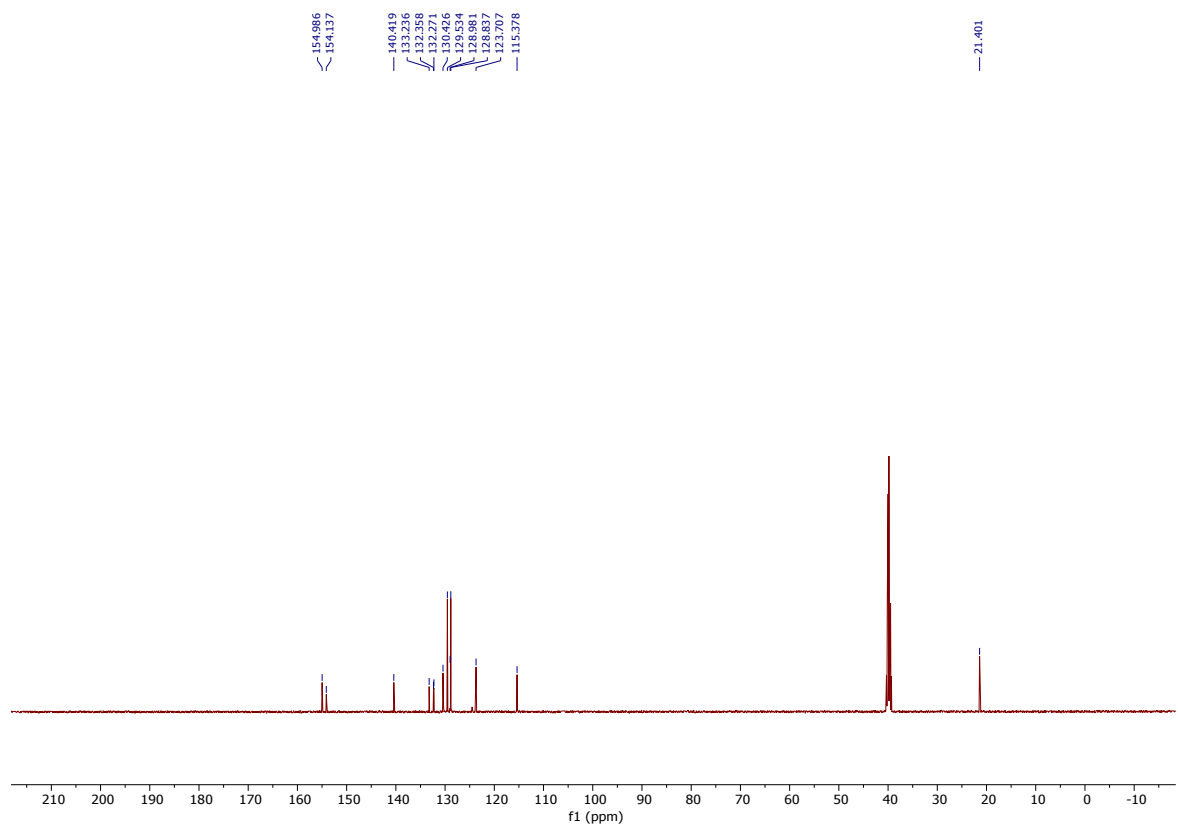



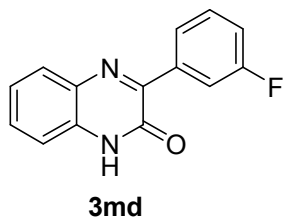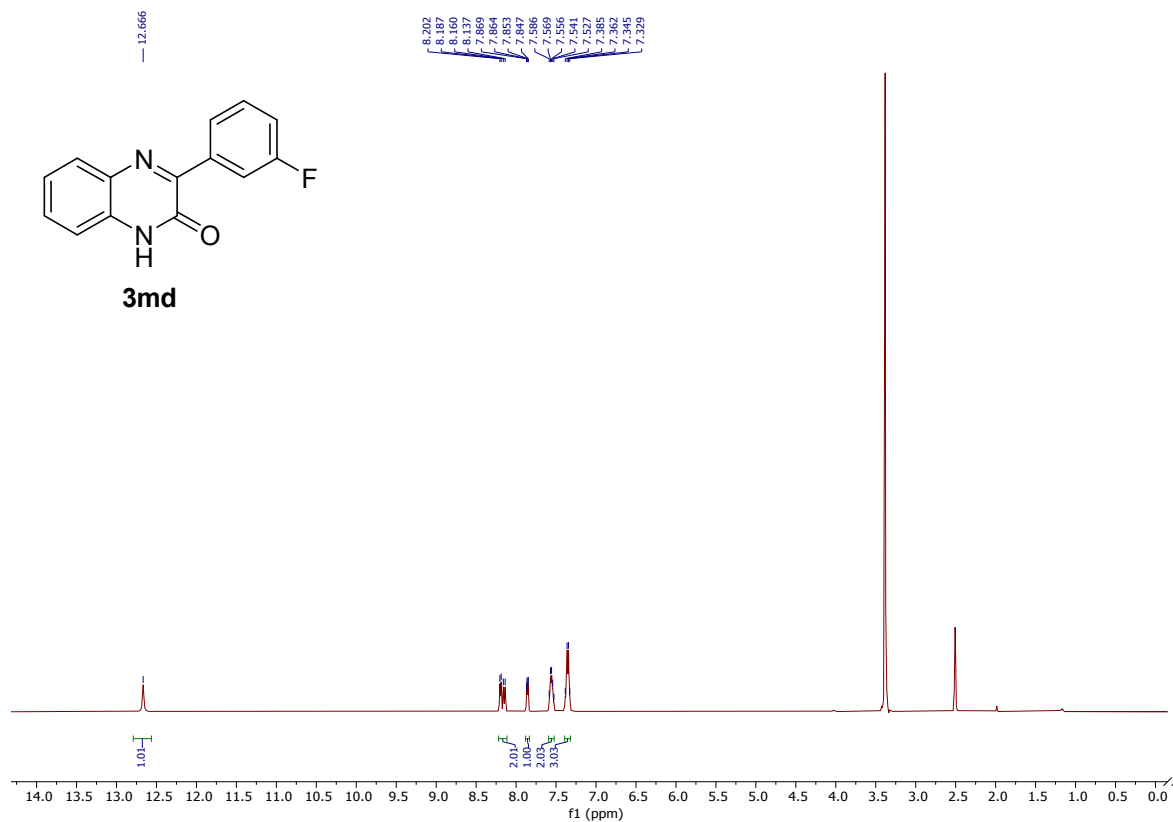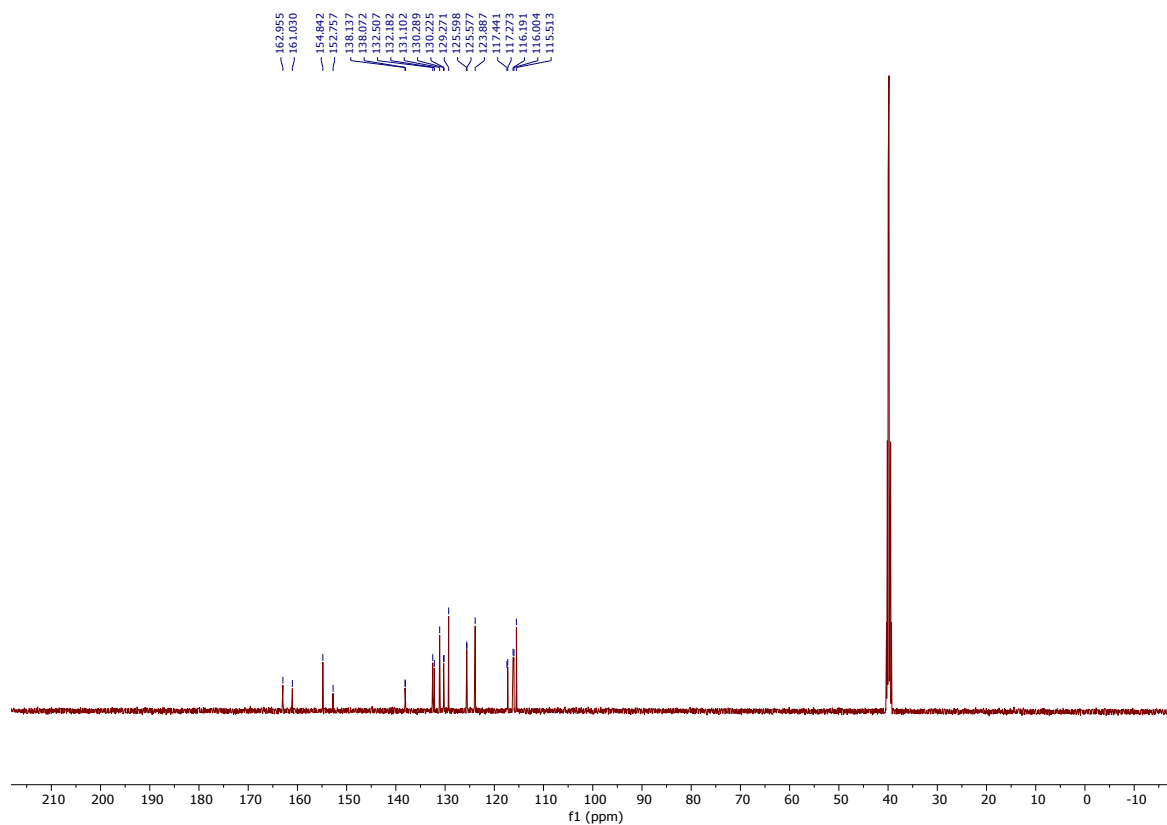

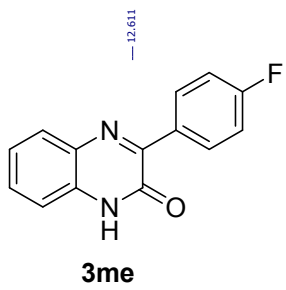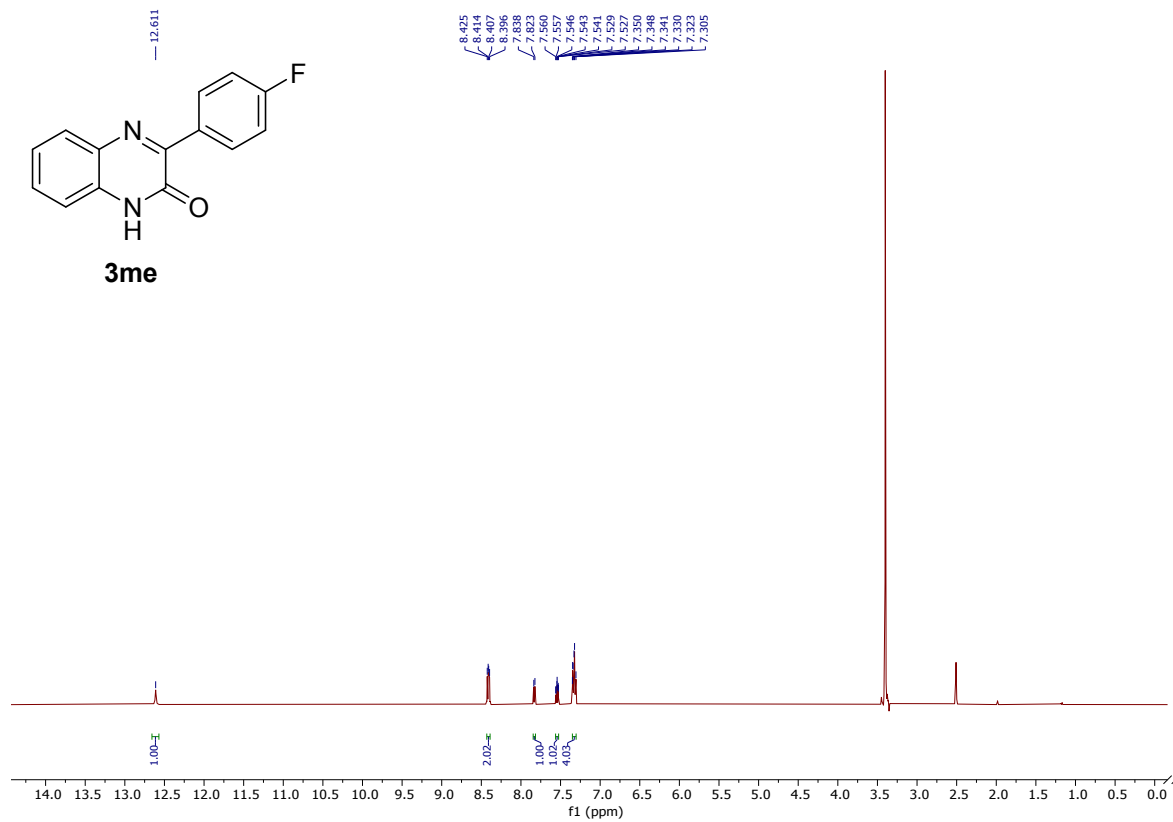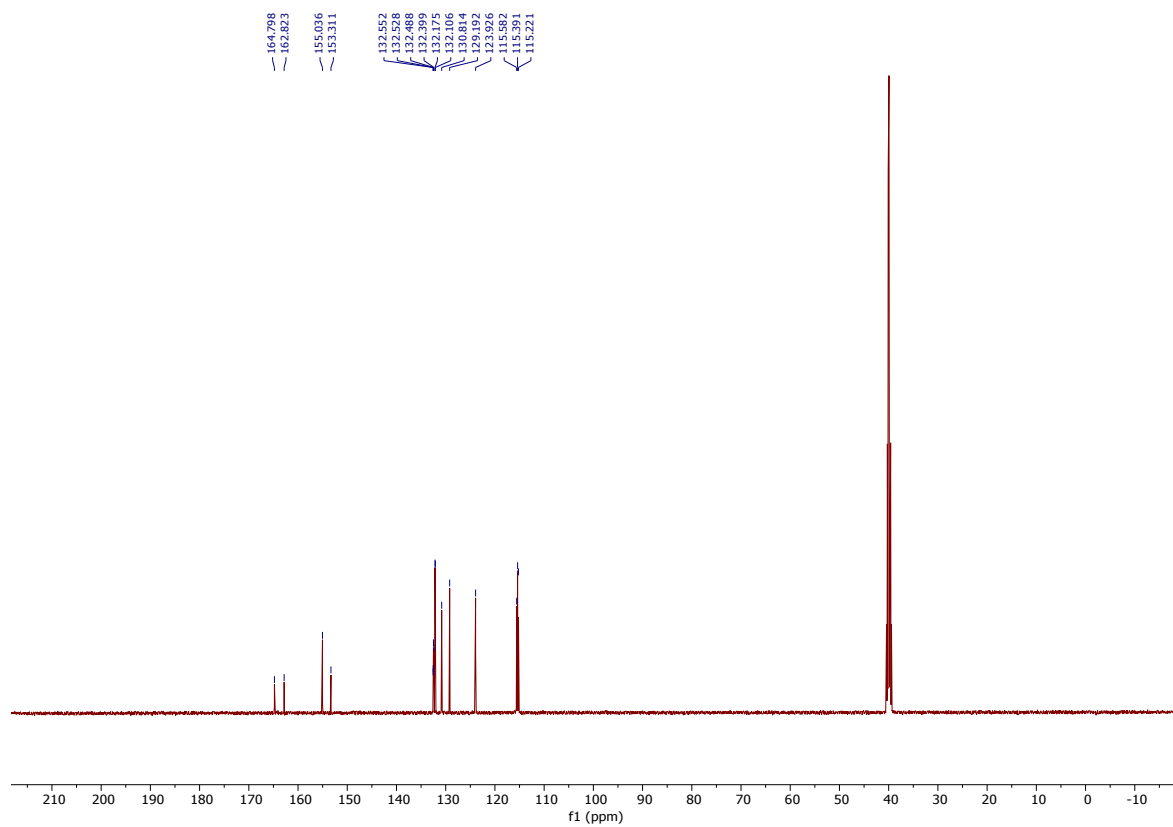

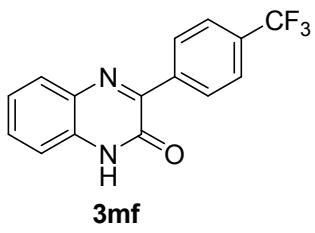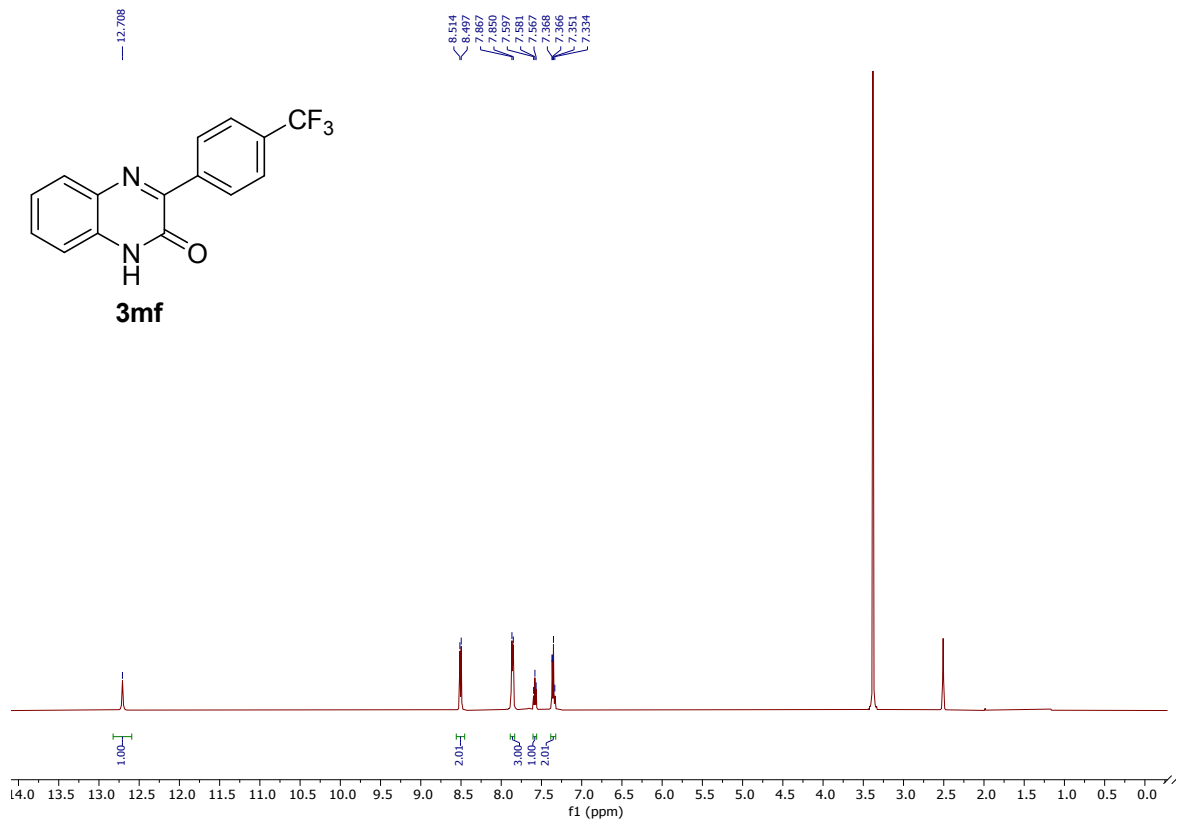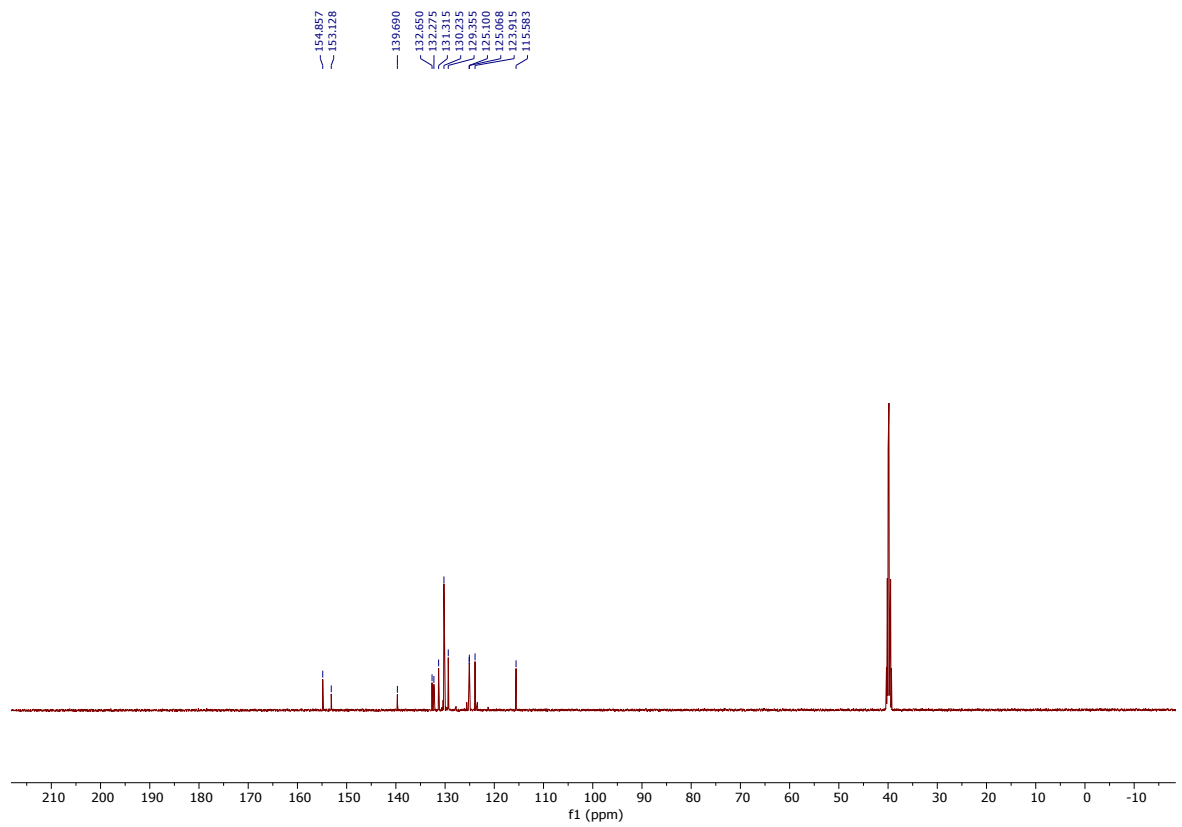

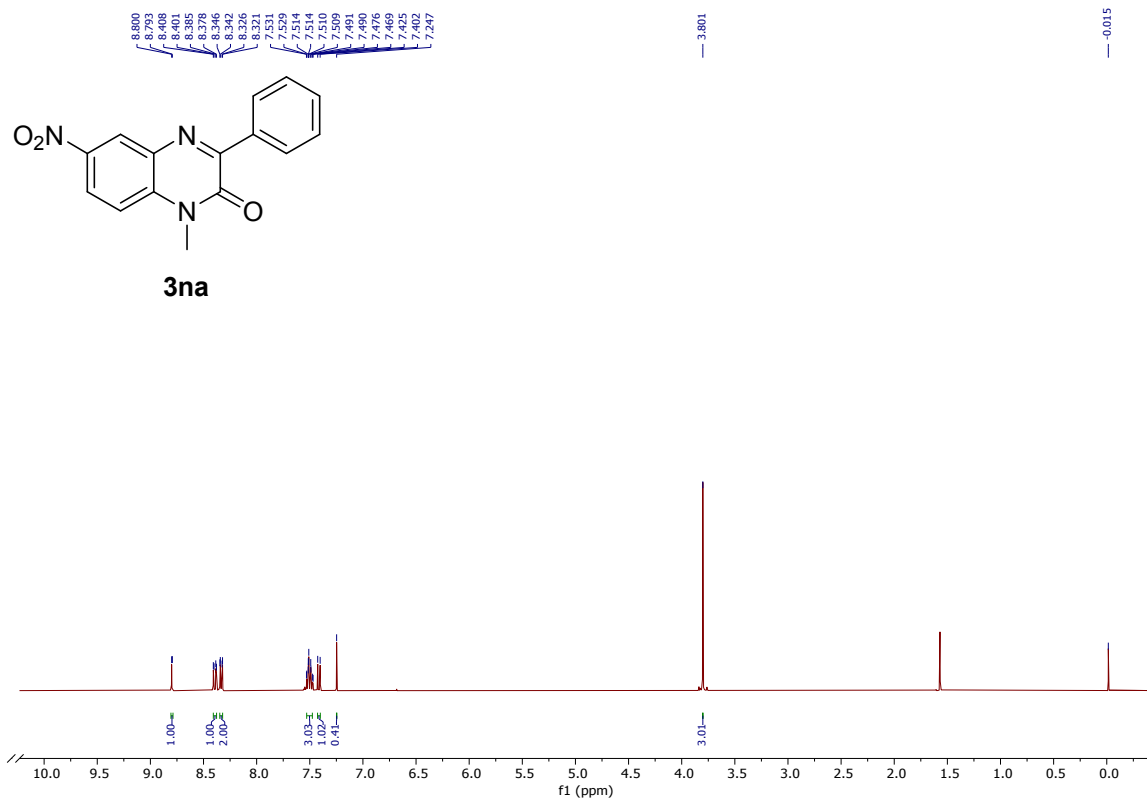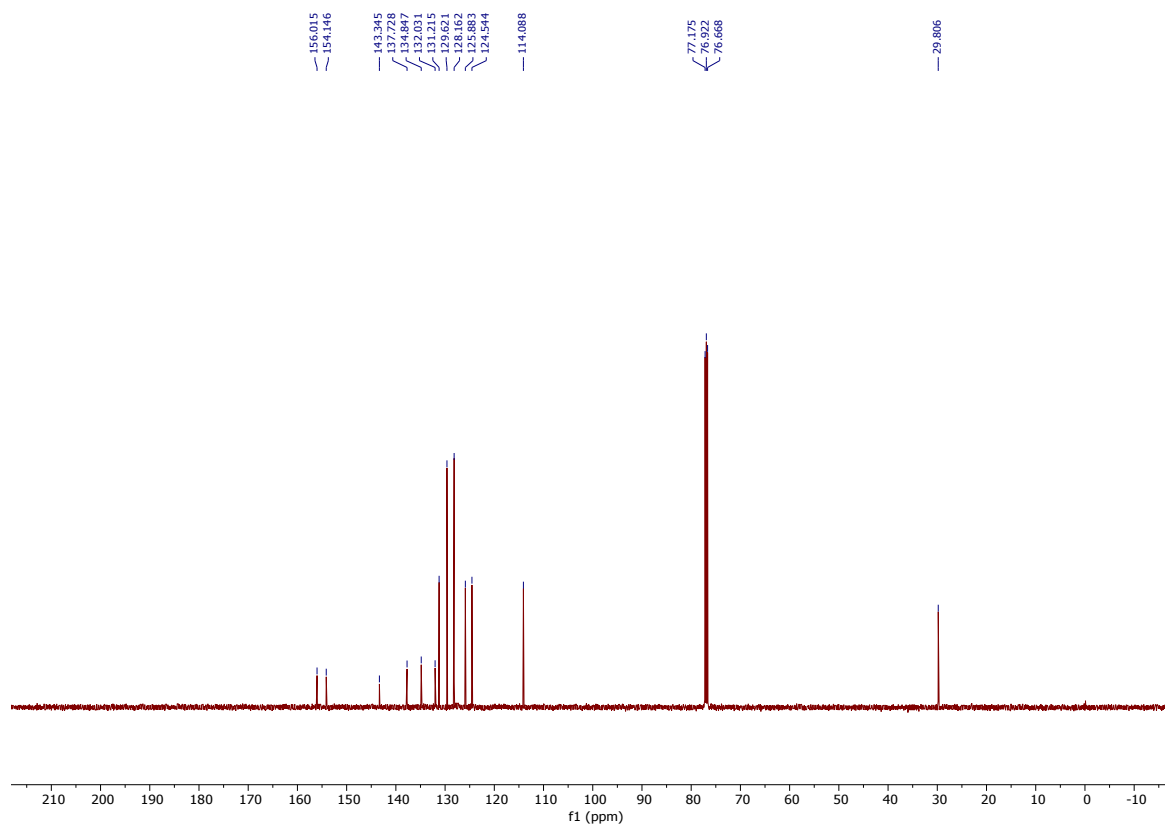

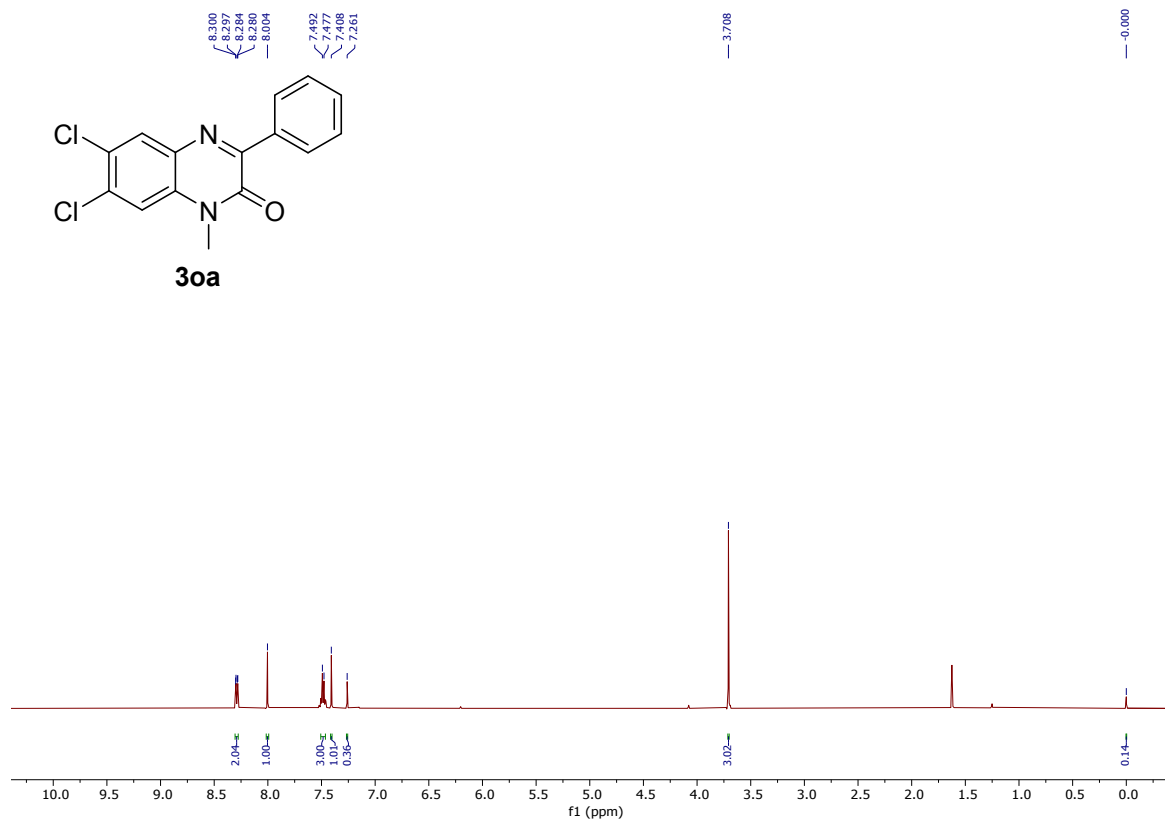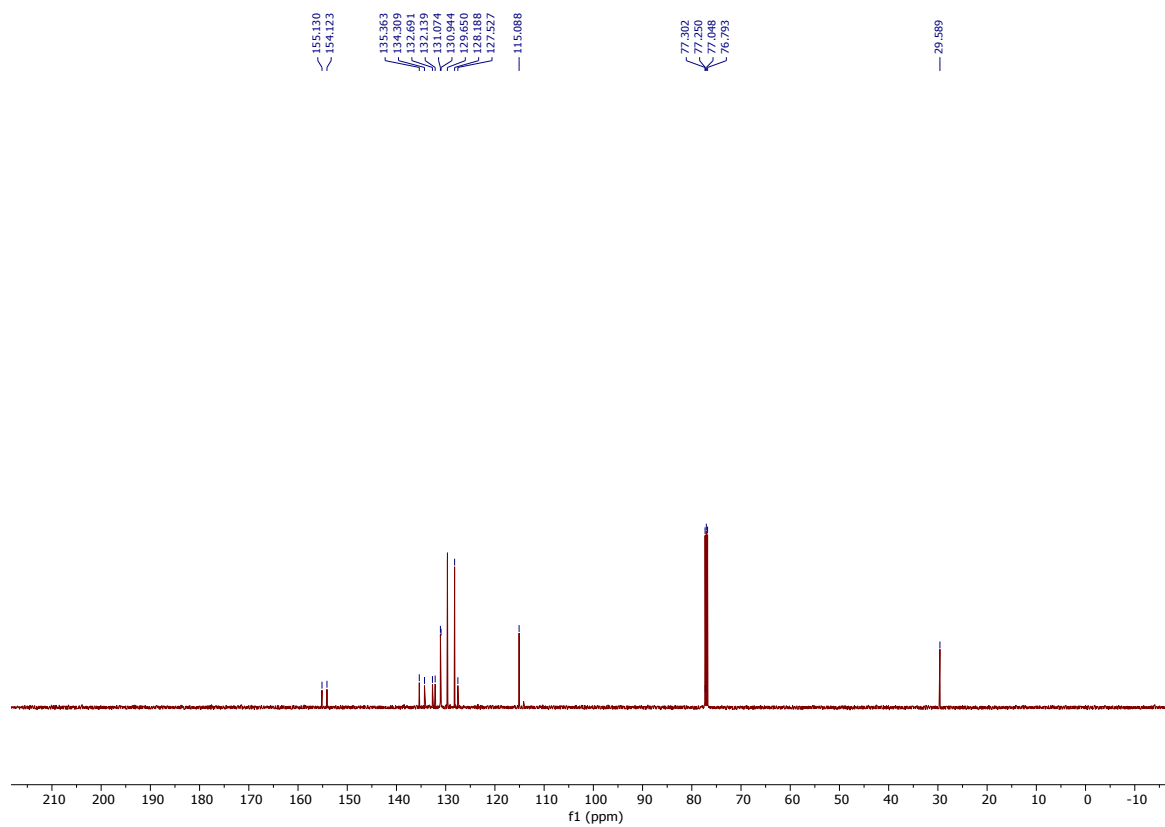

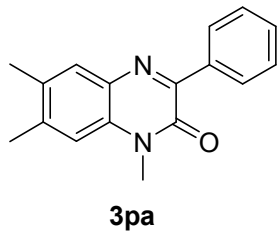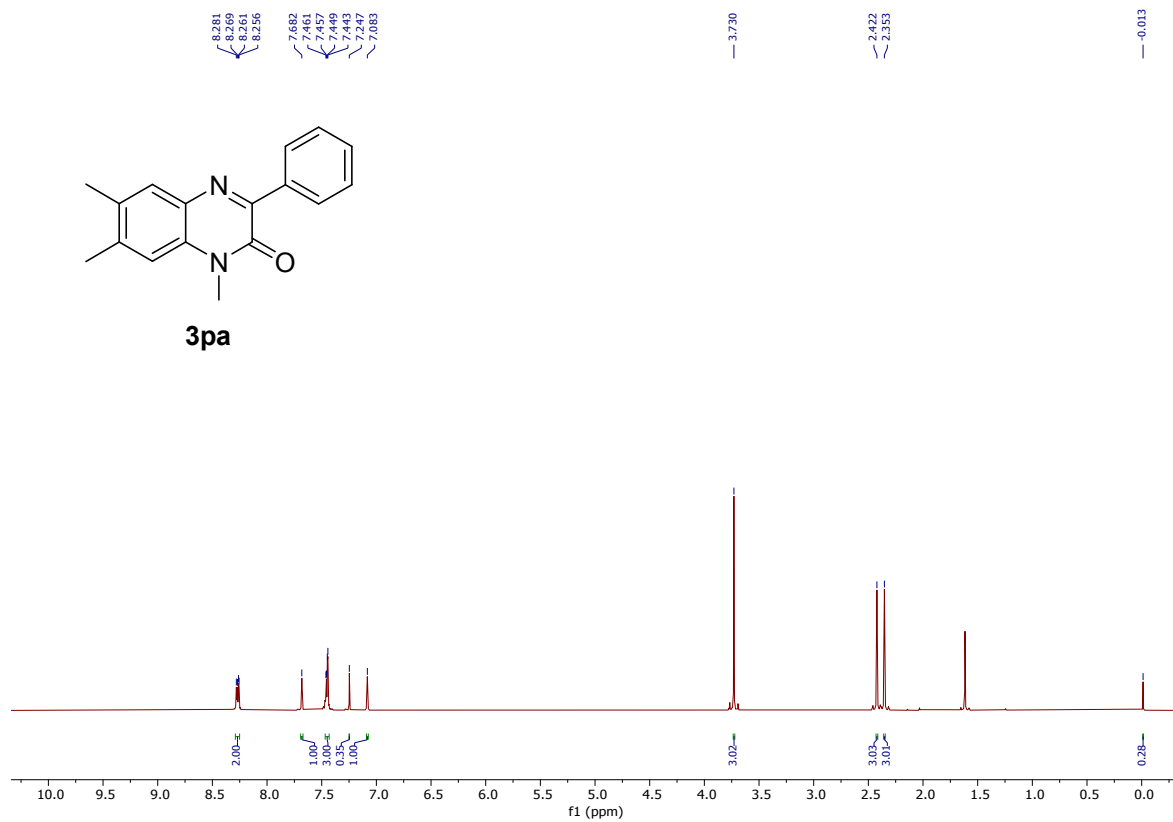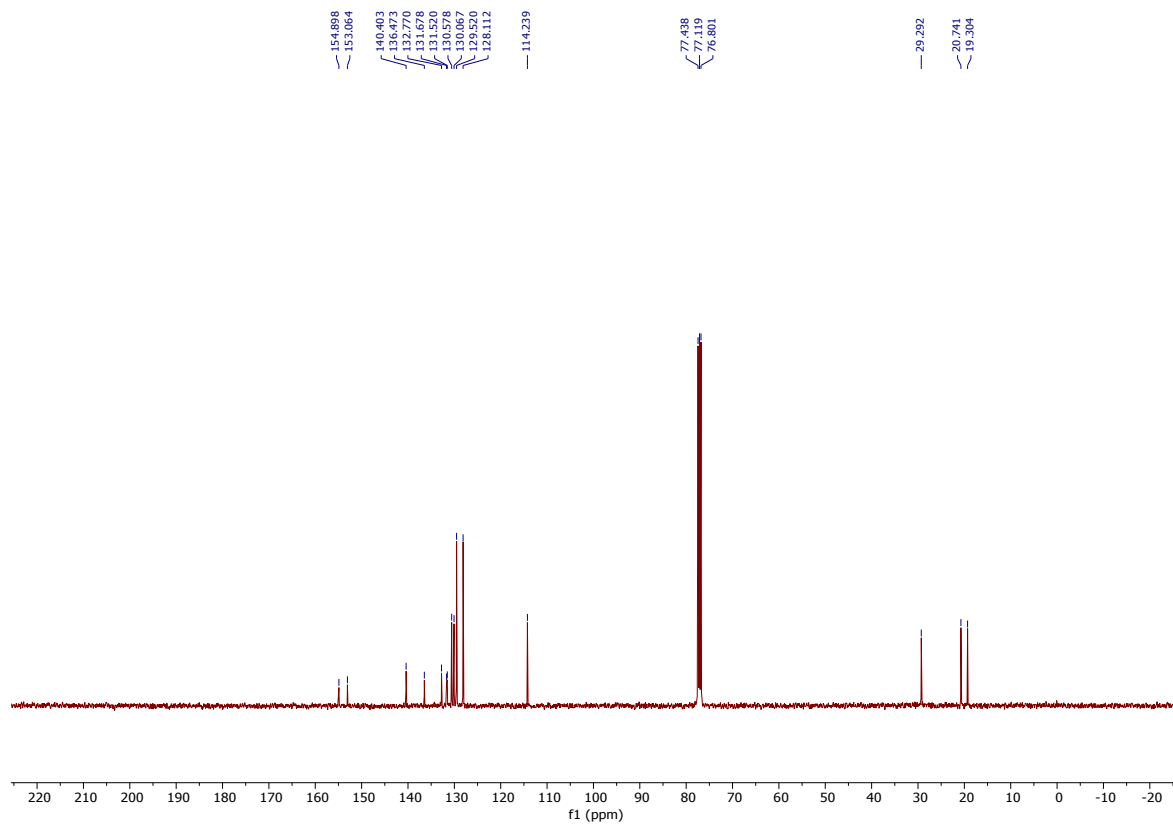

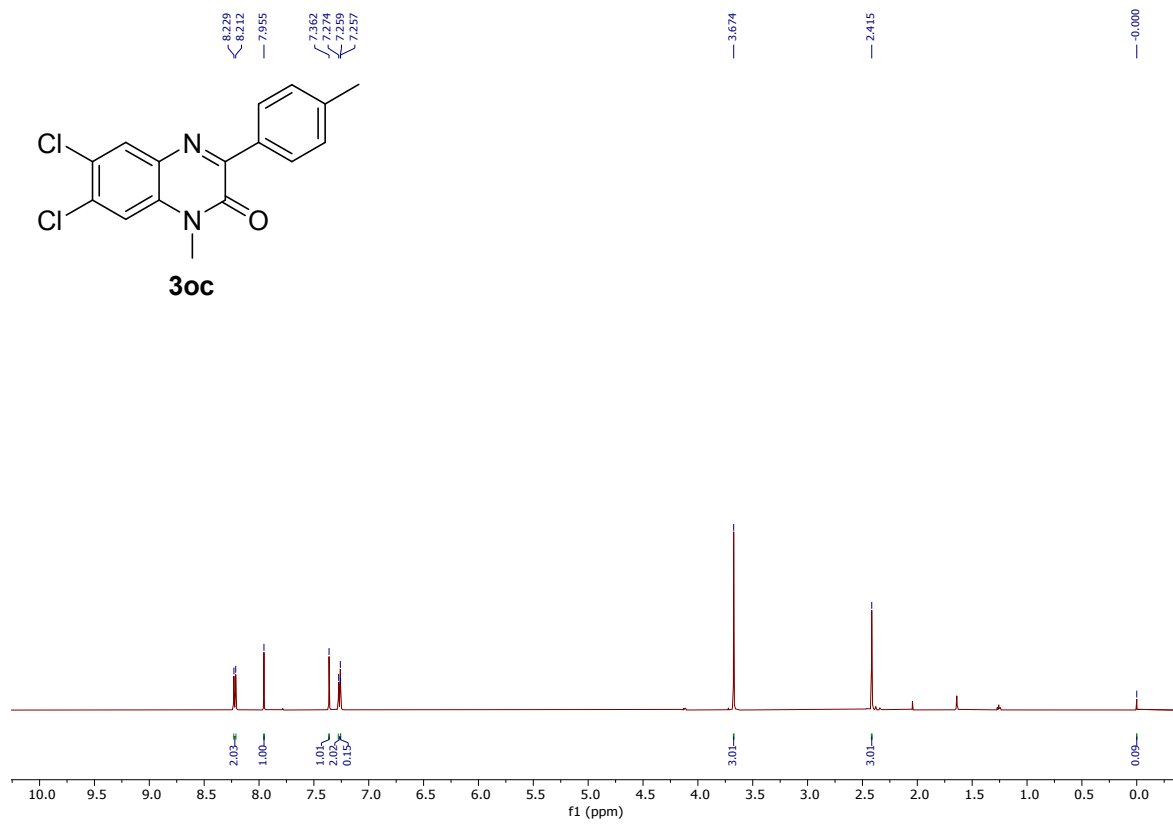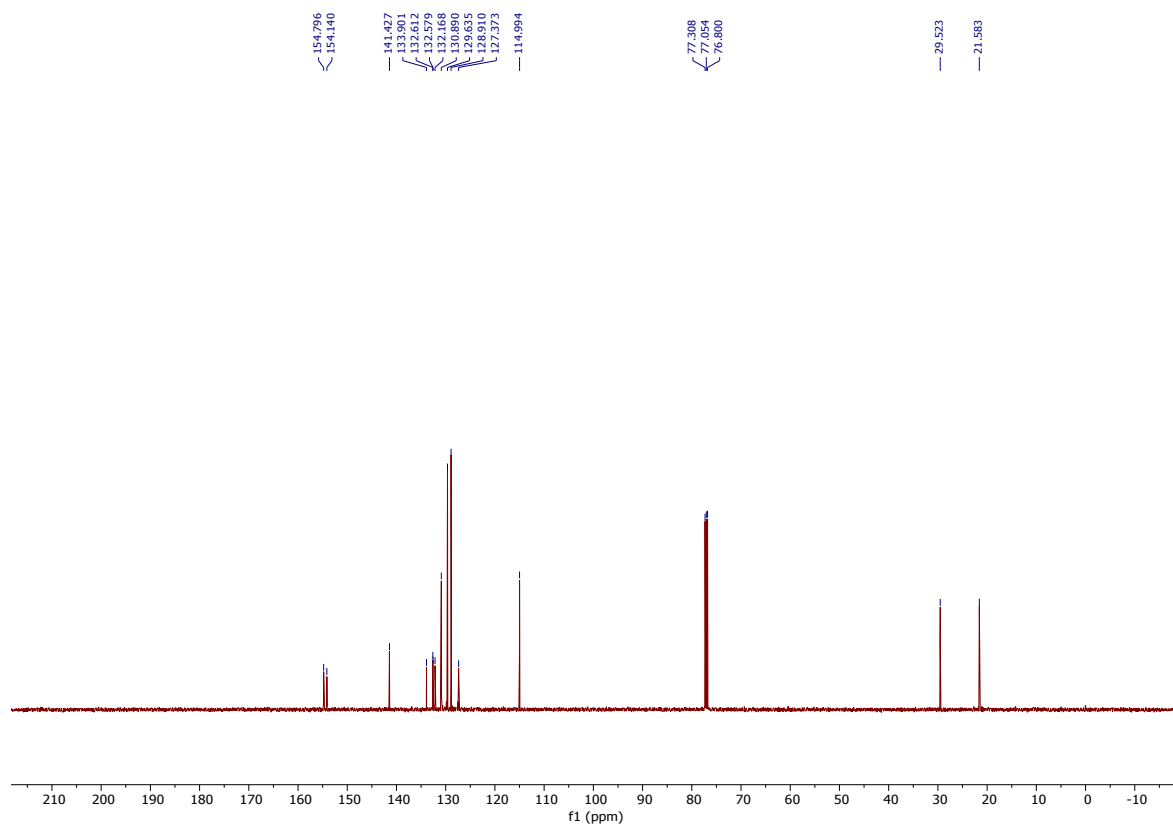

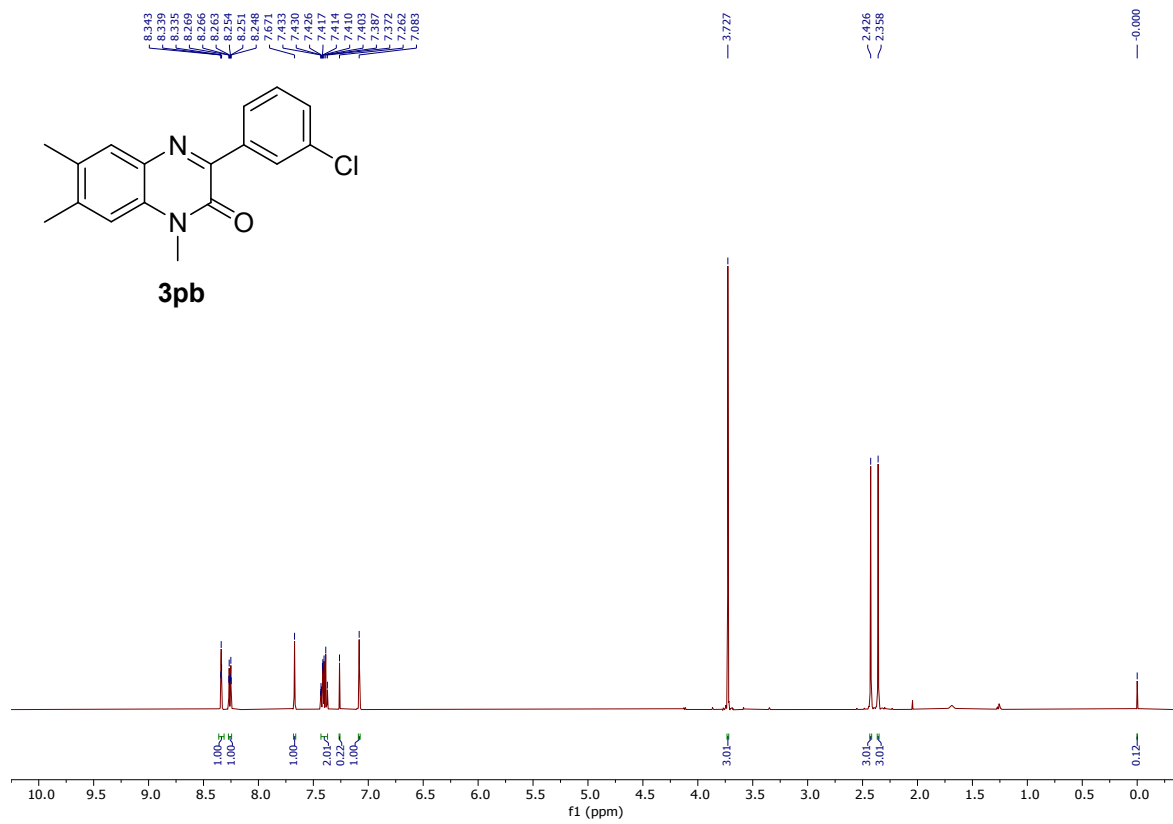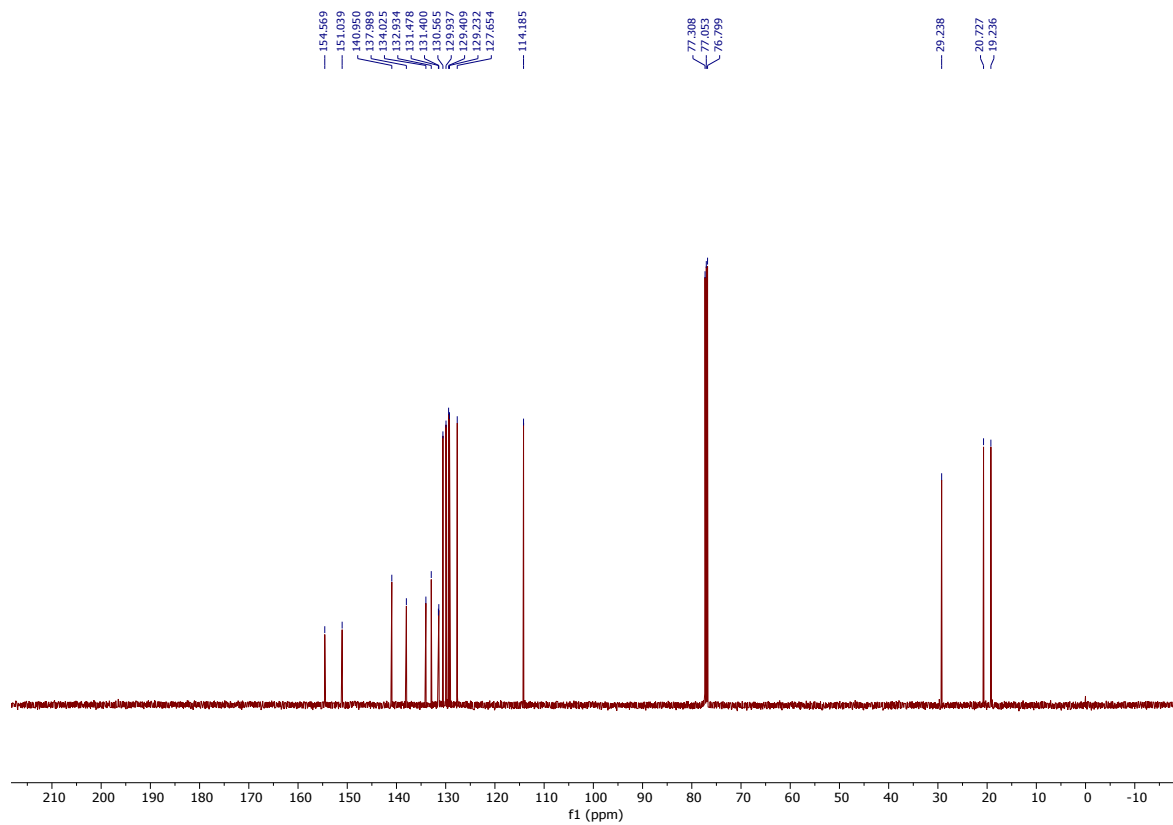



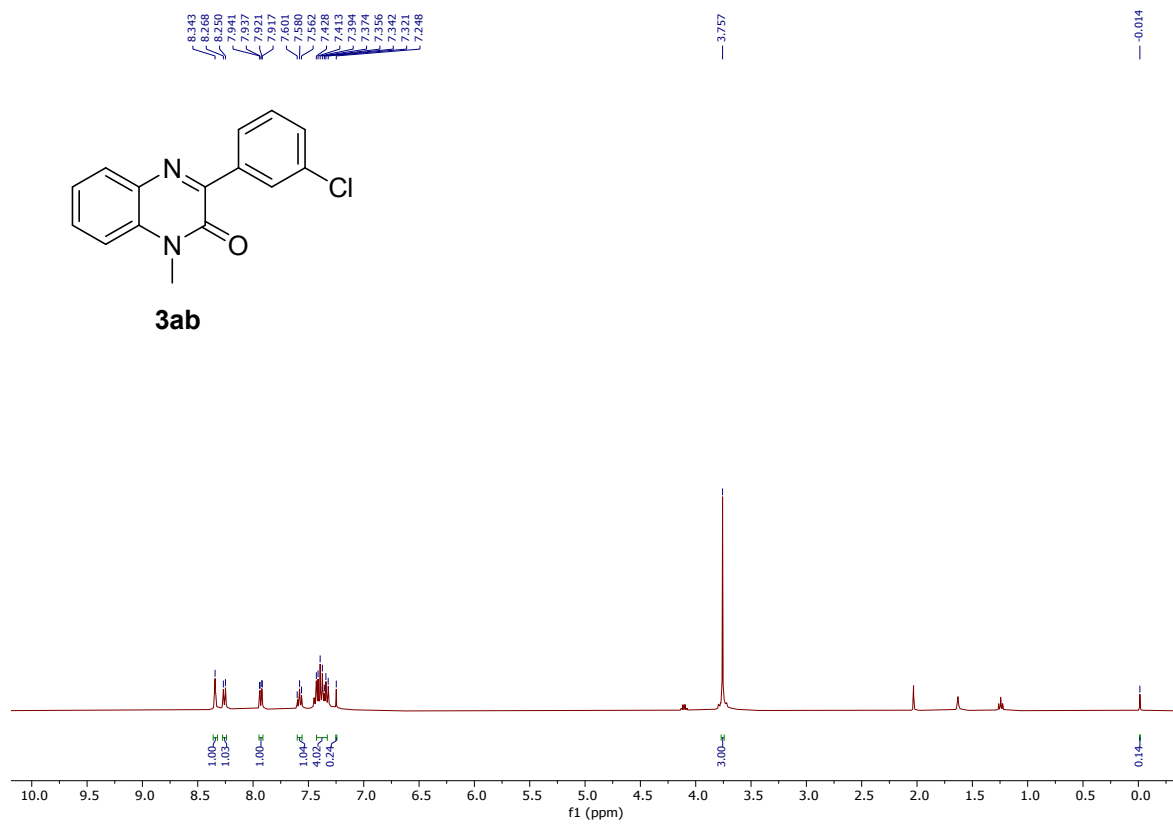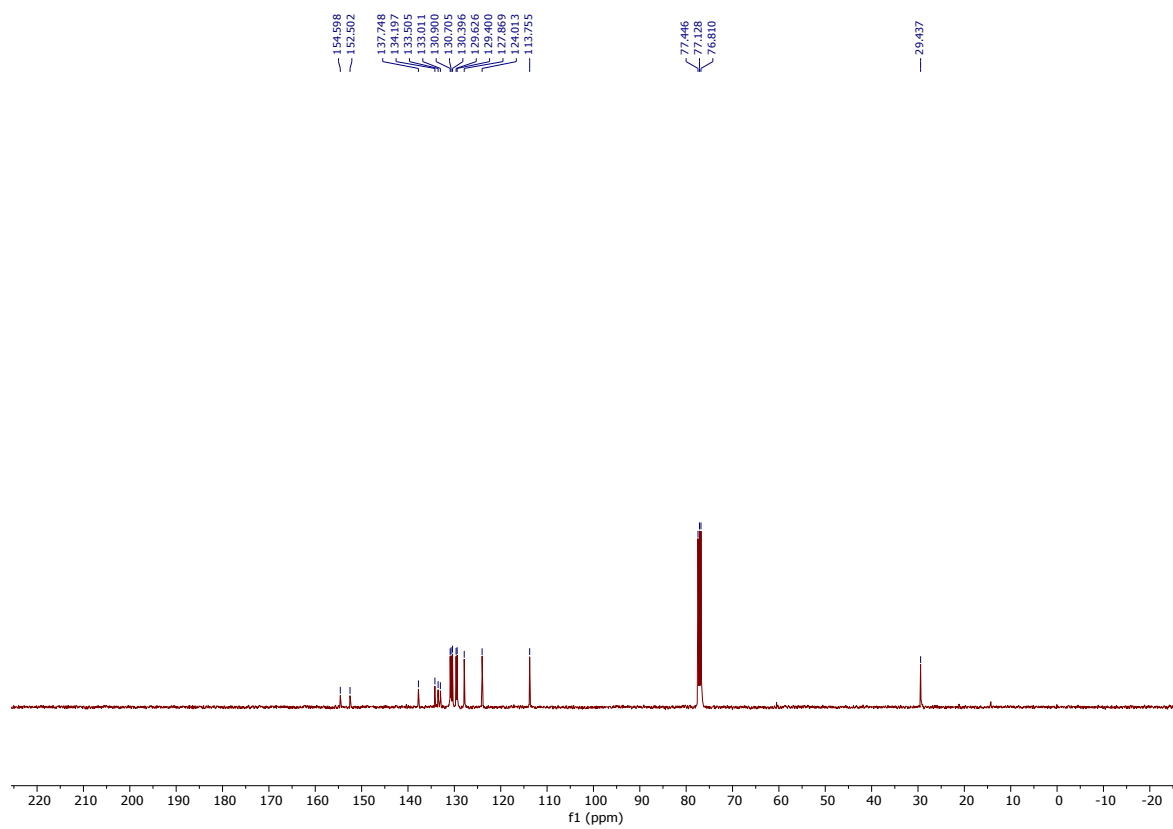

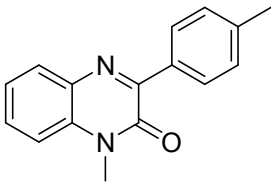

**3ac**

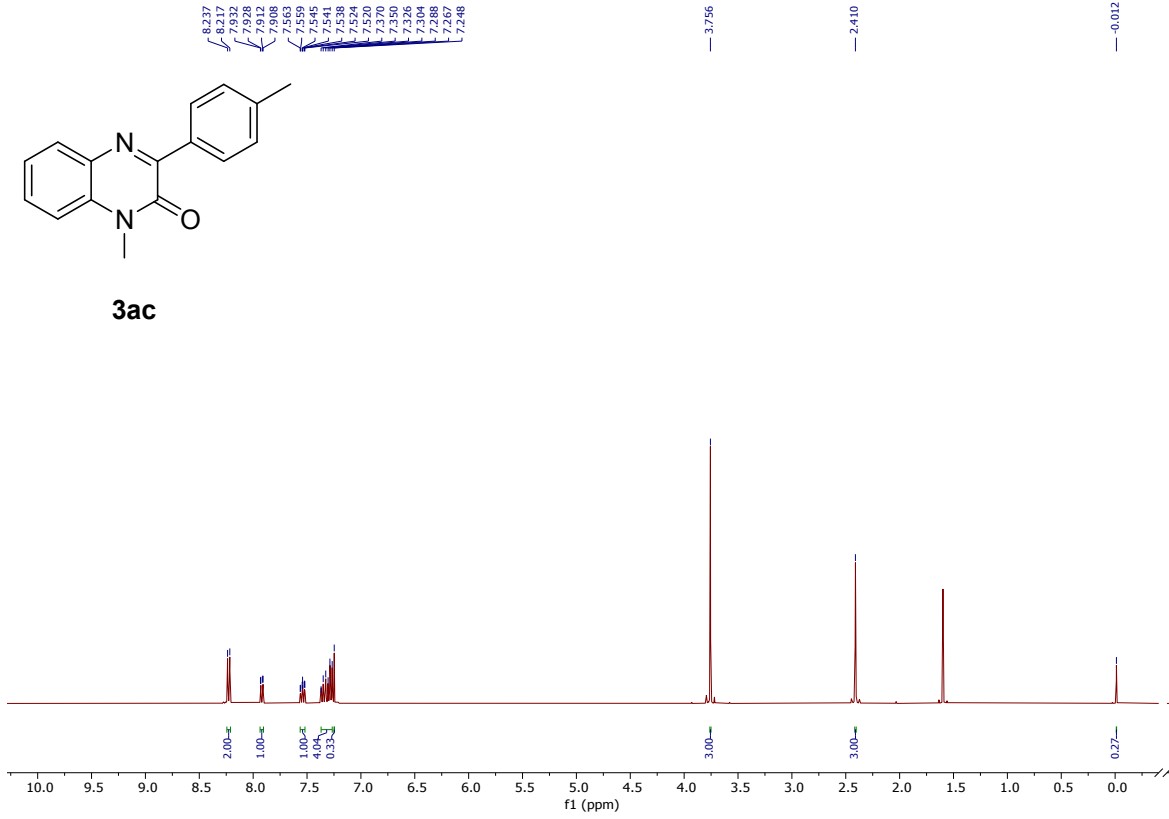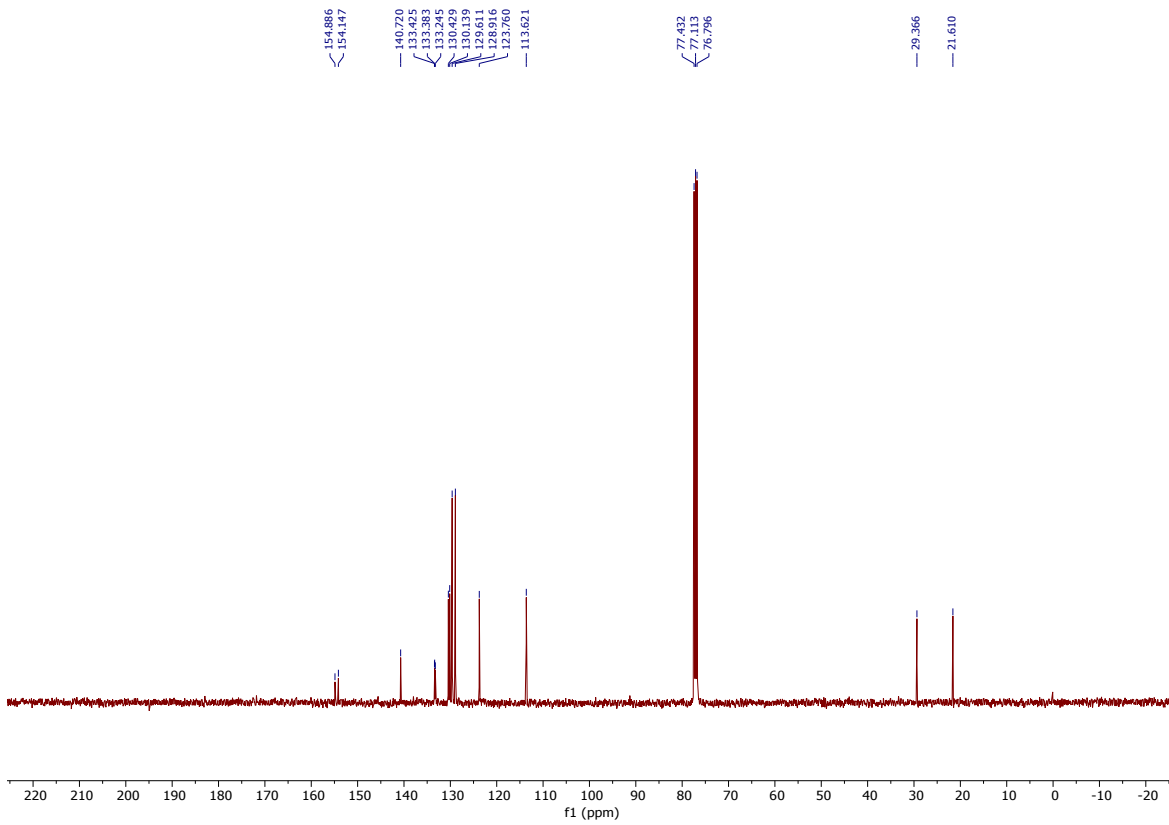

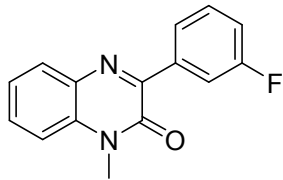

3ad

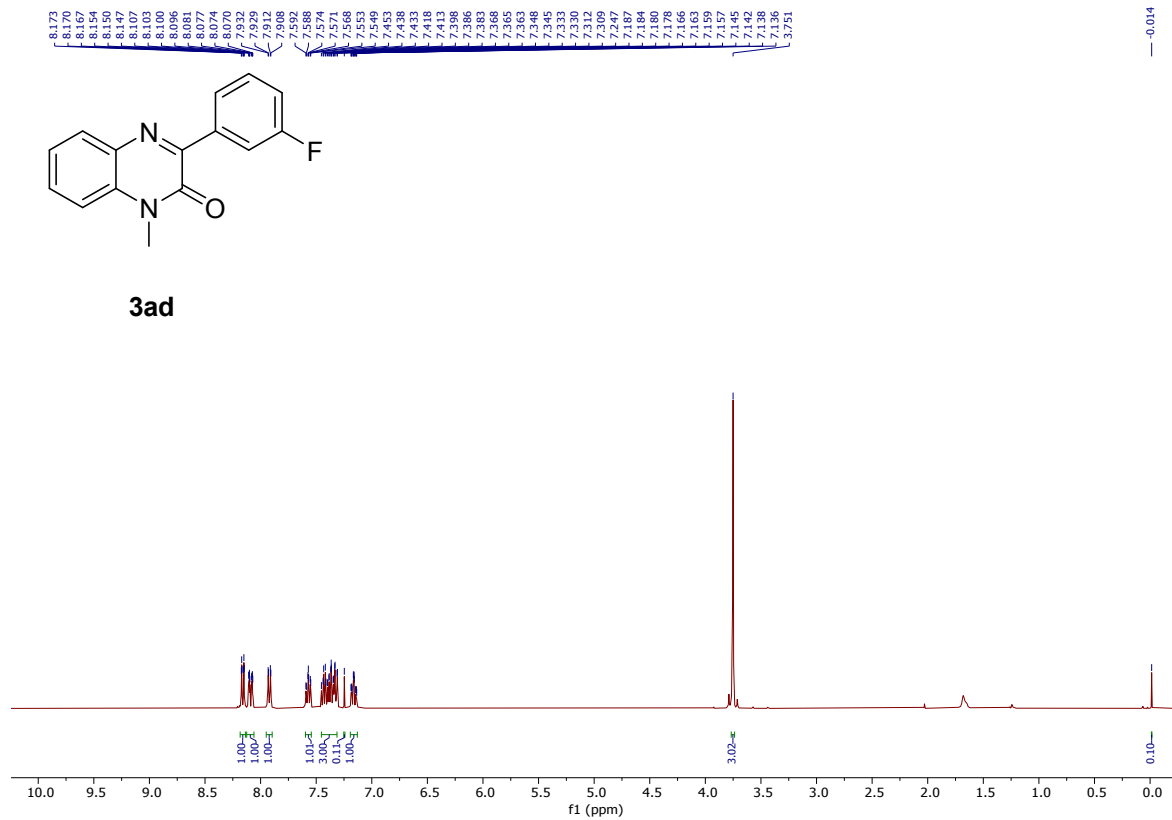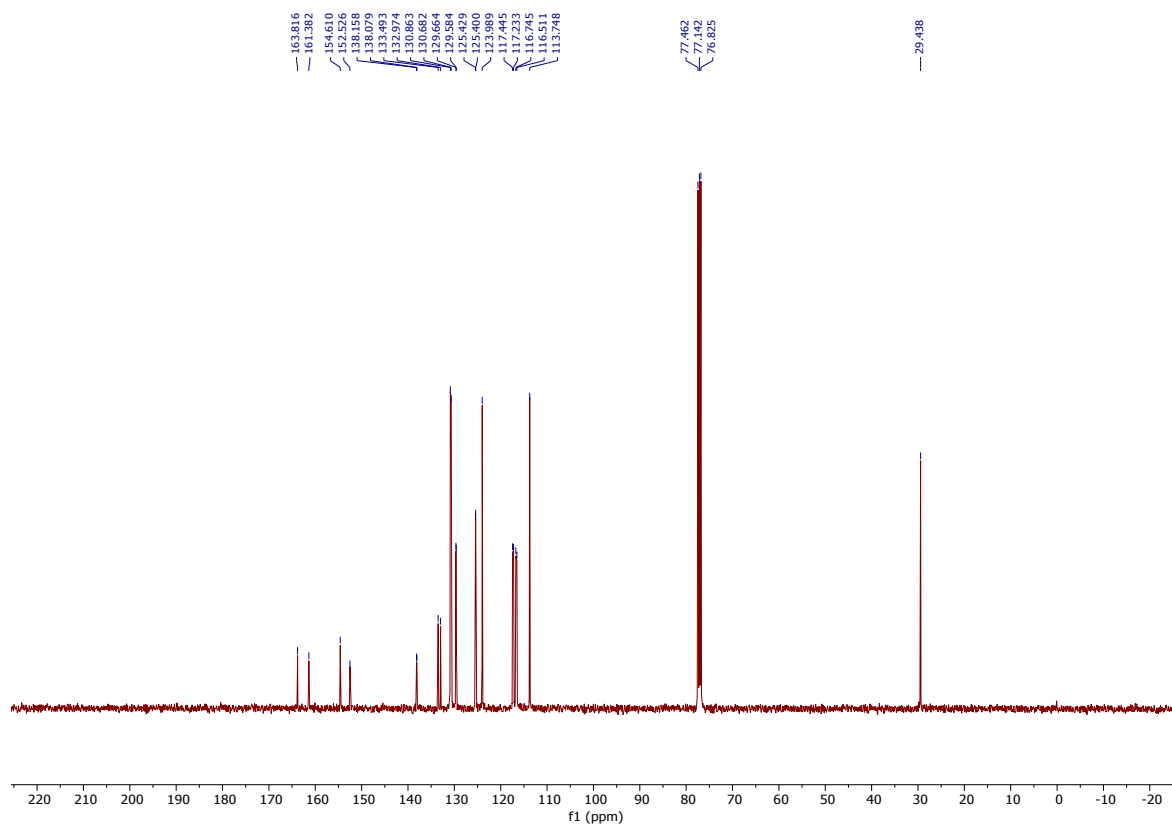

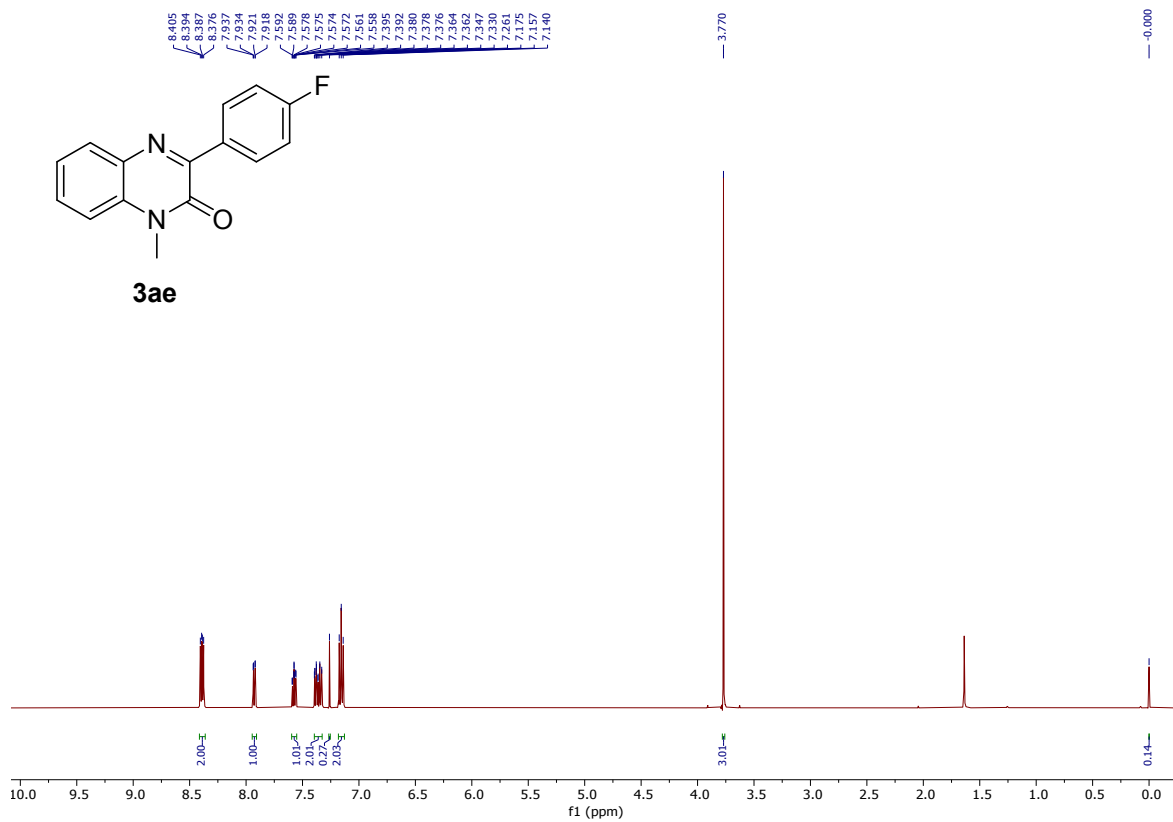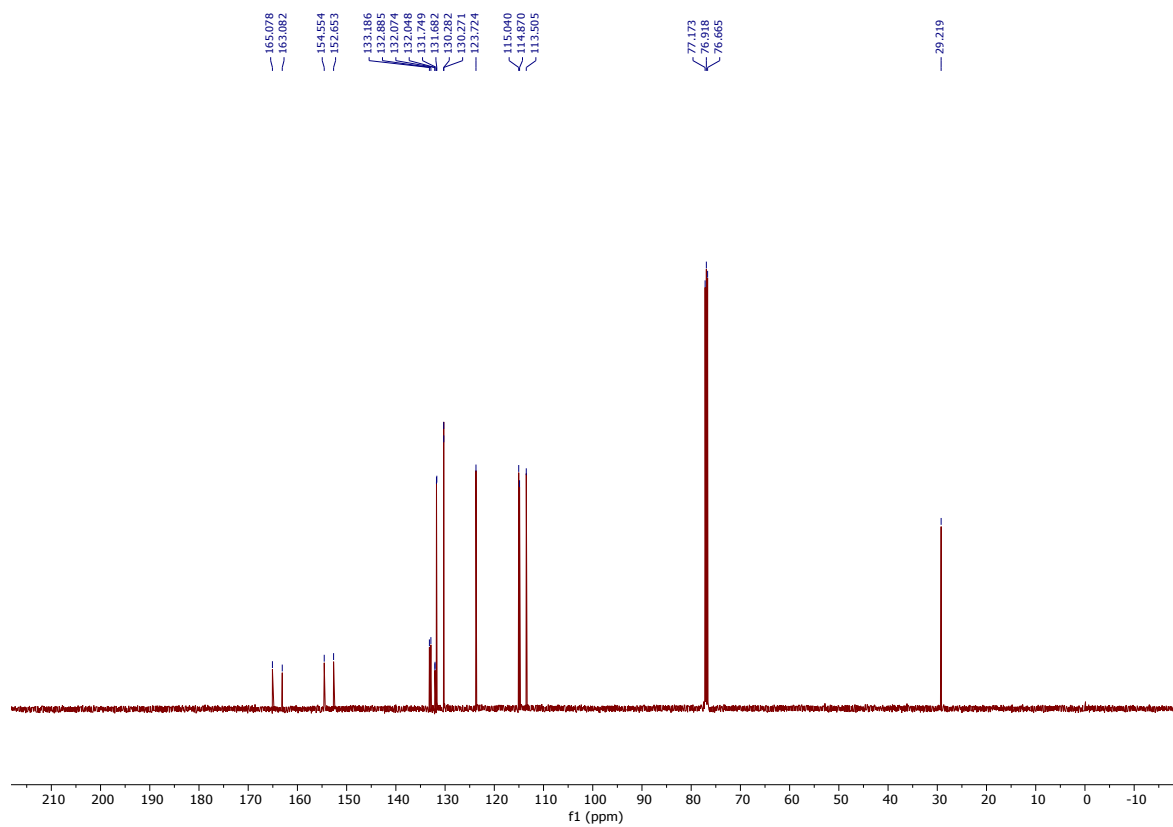

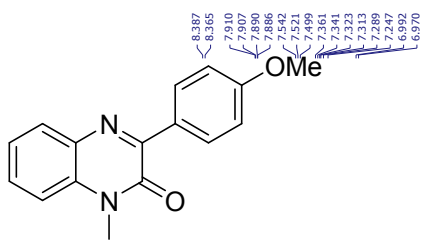

**3ag**

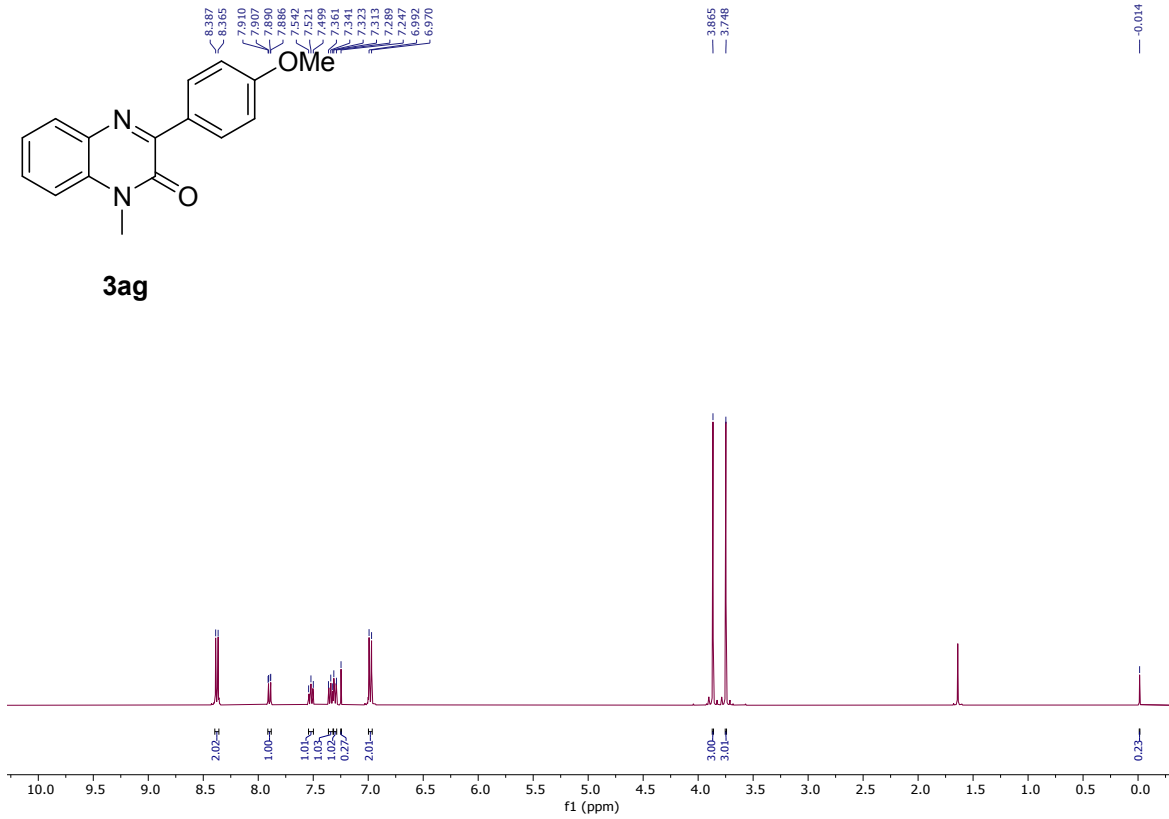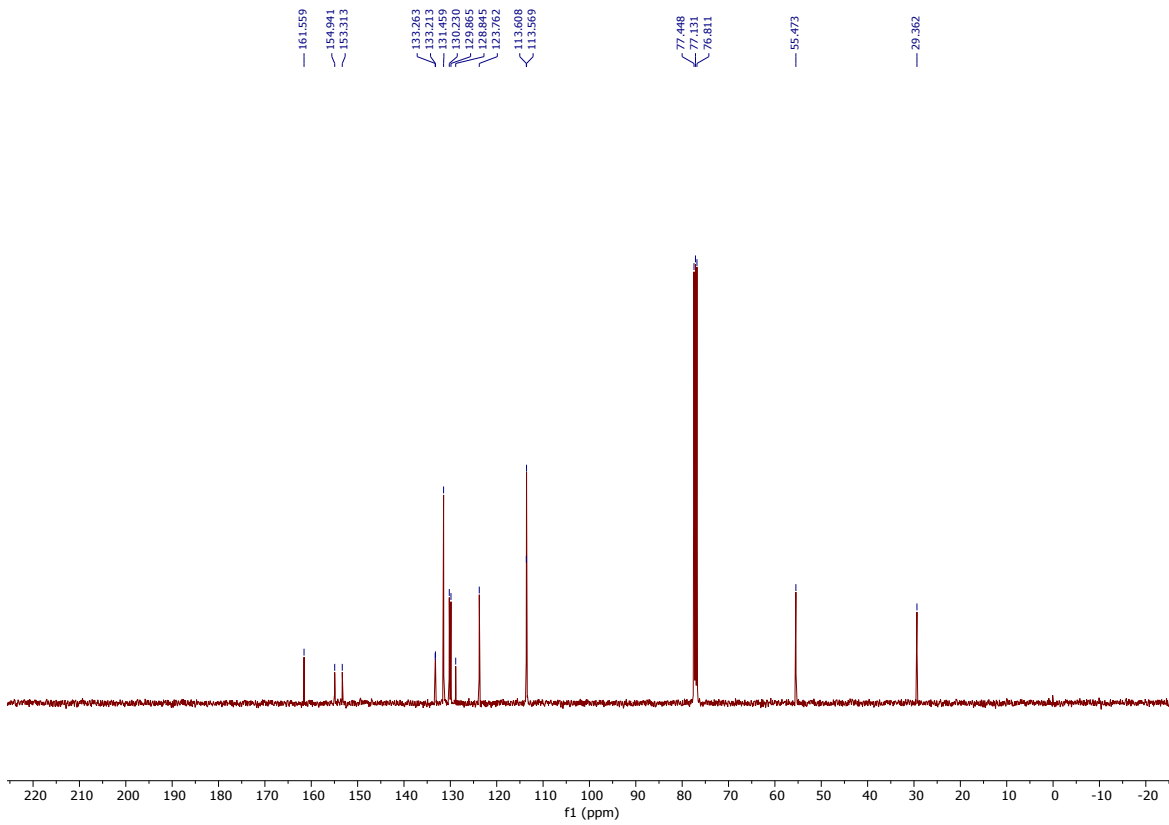

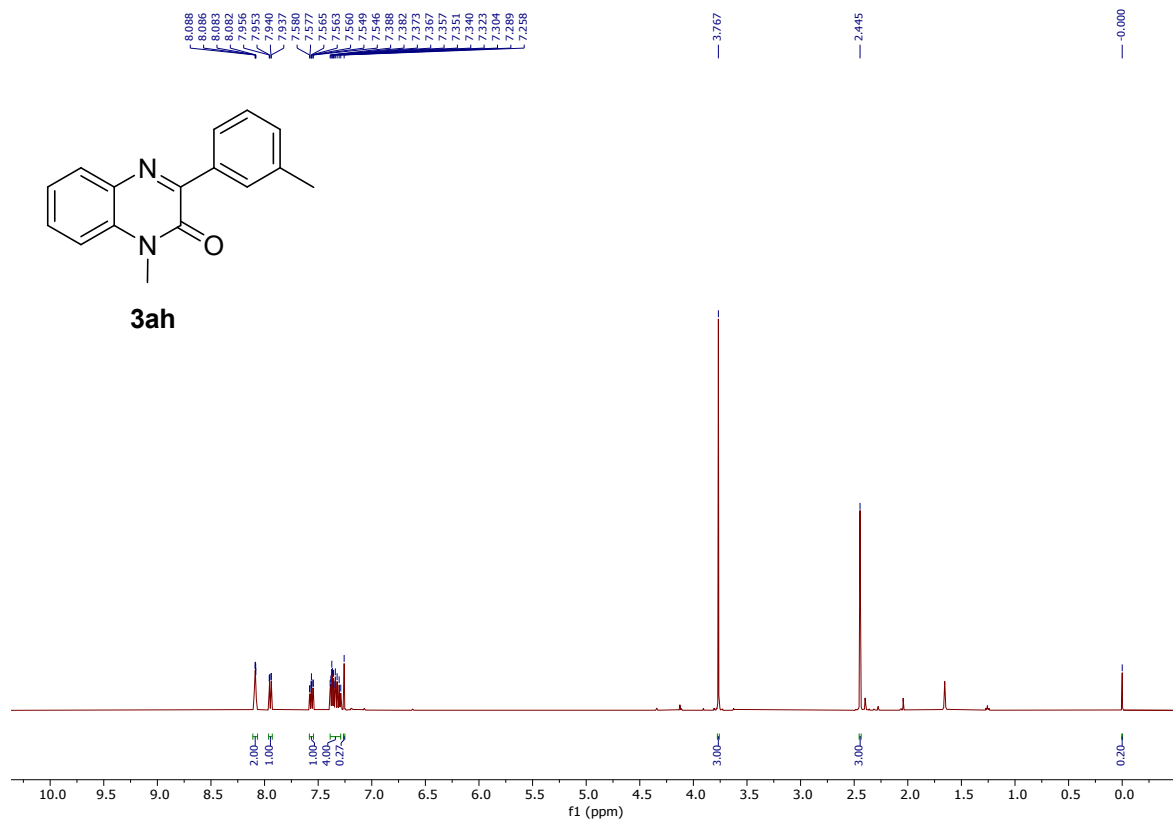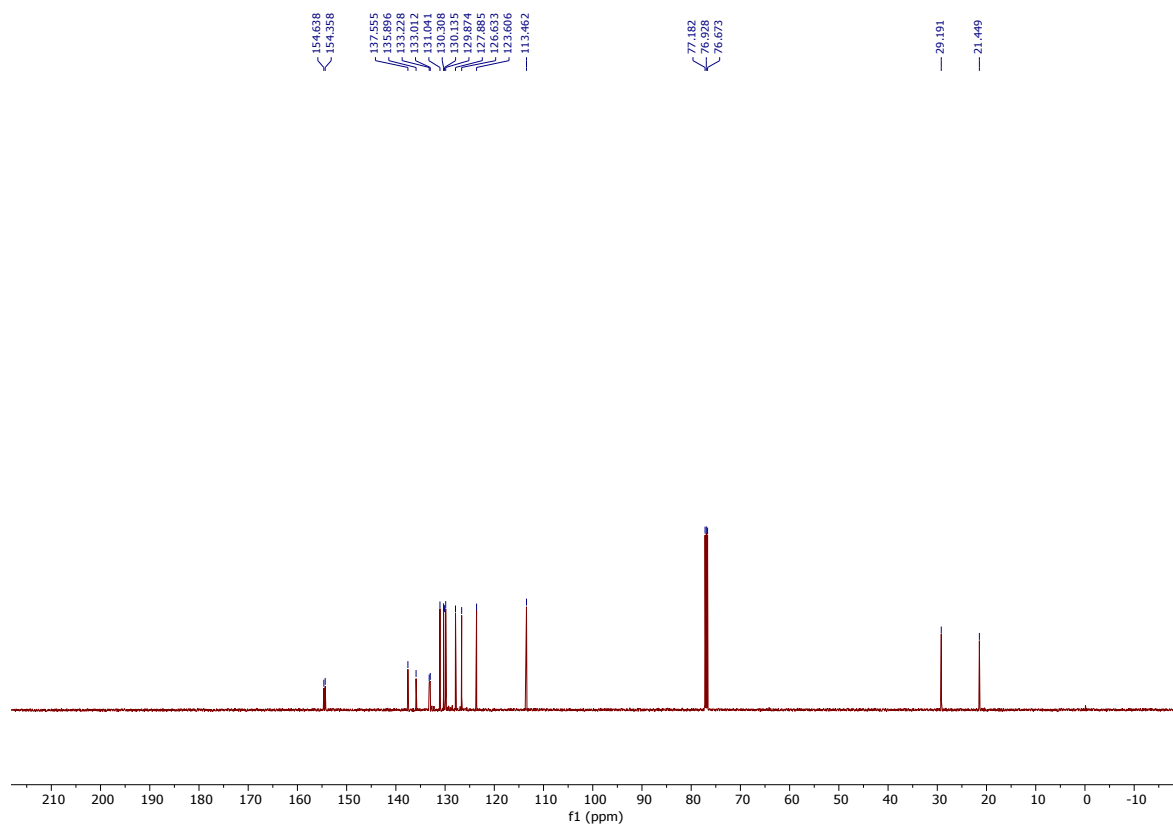

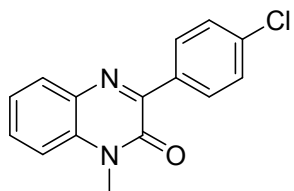

**3ai**

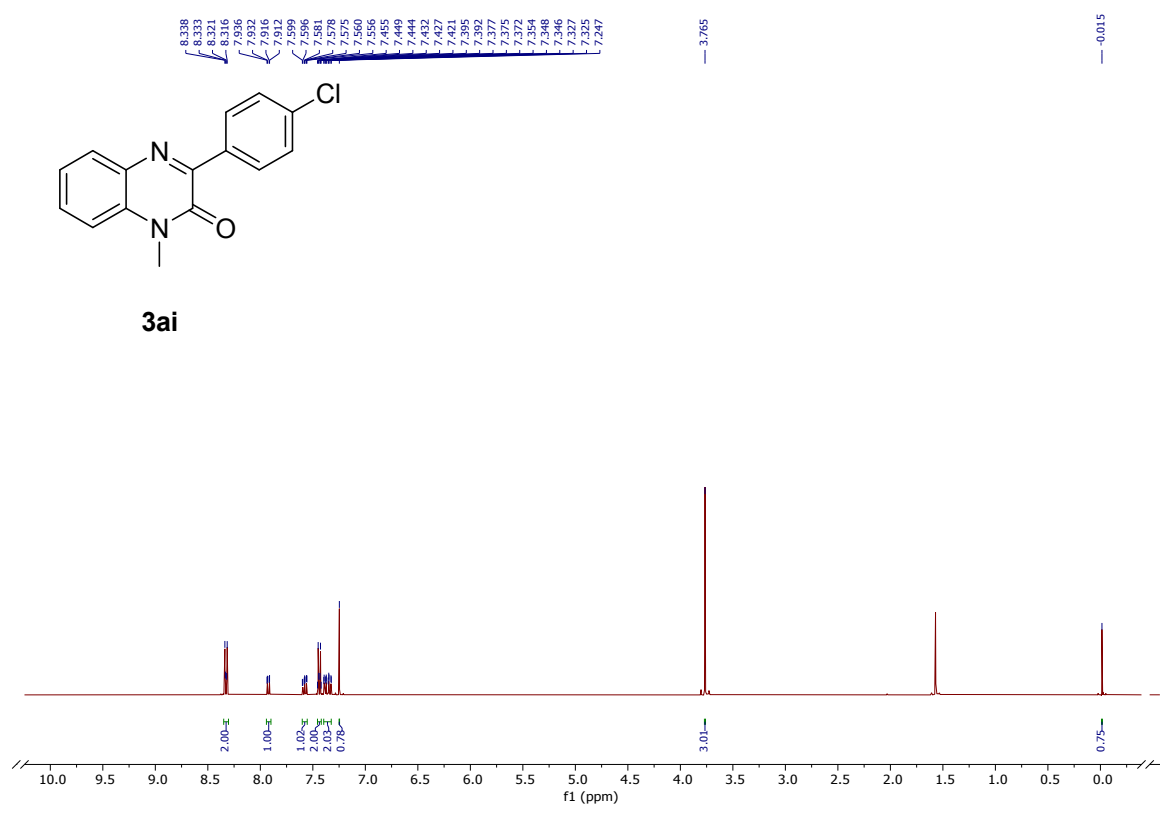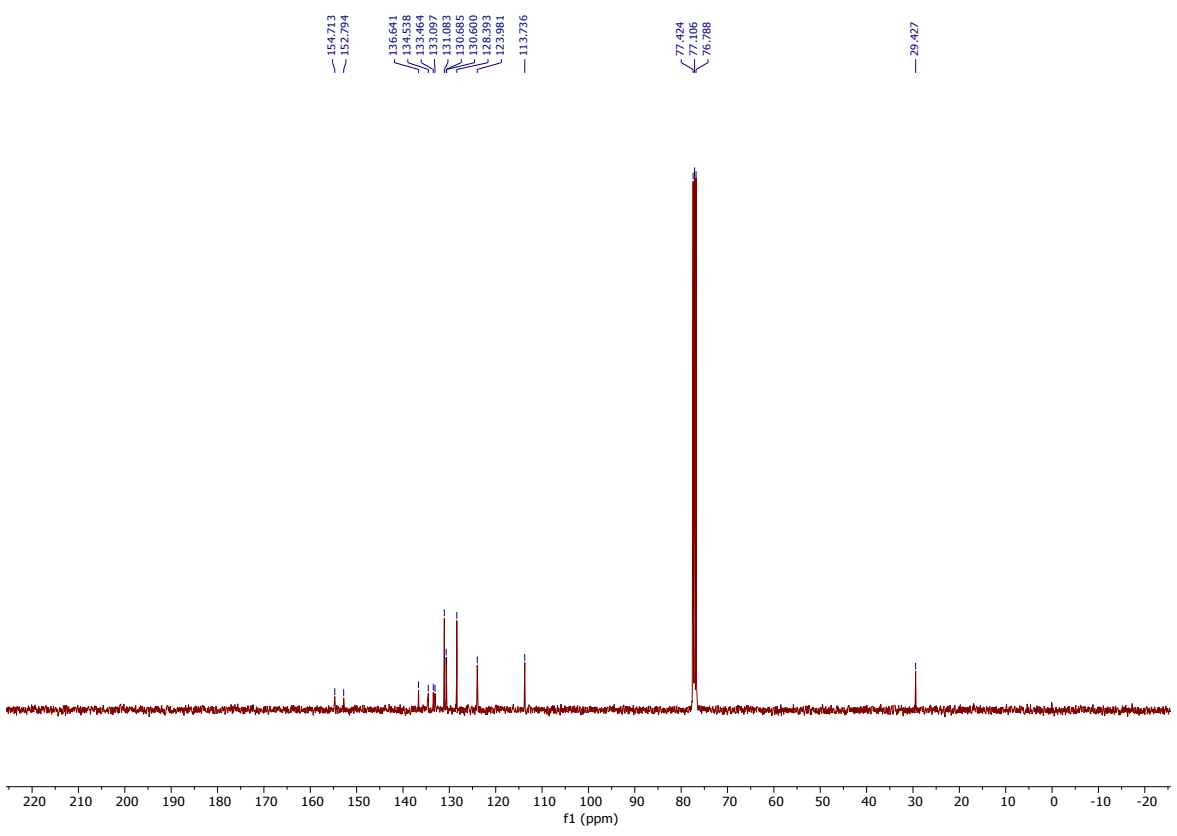

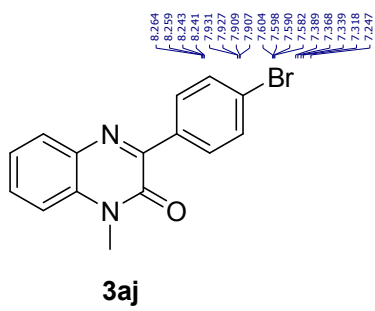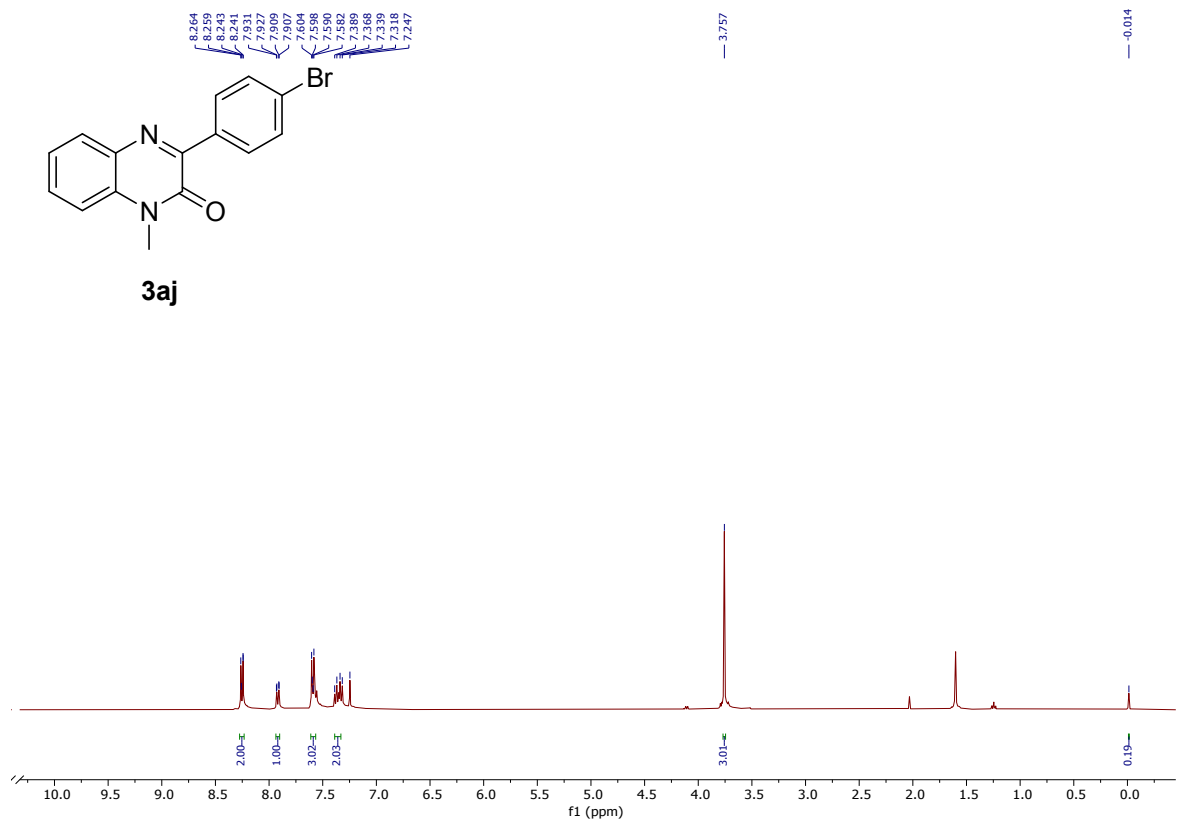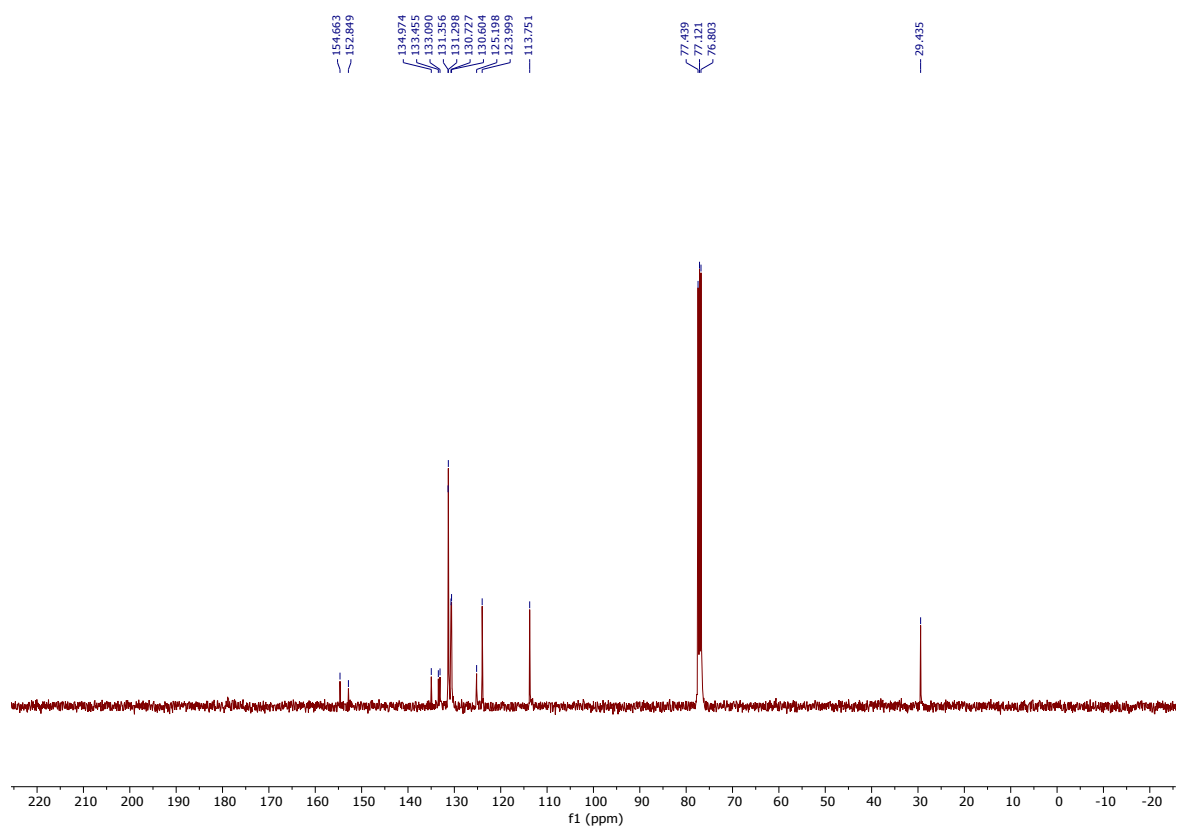



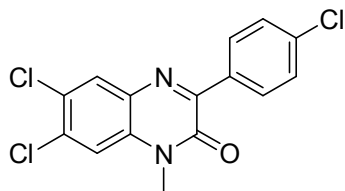

**3oi**

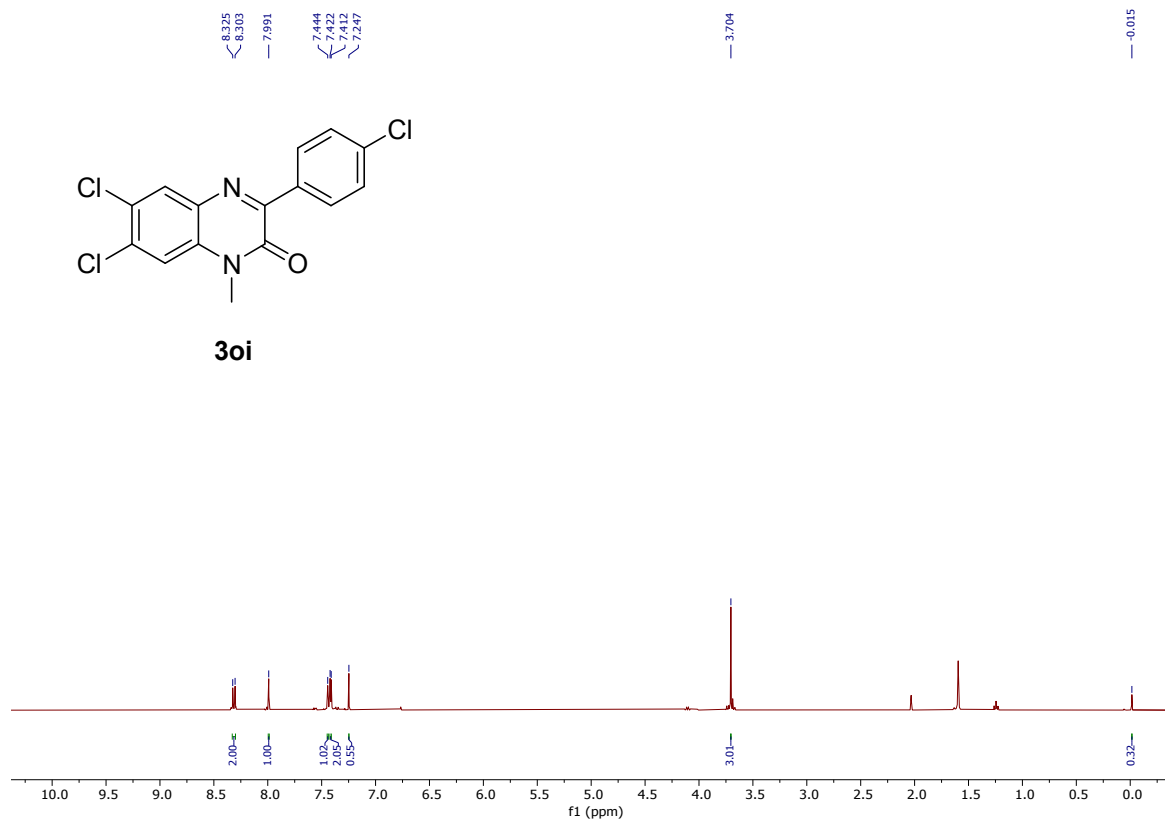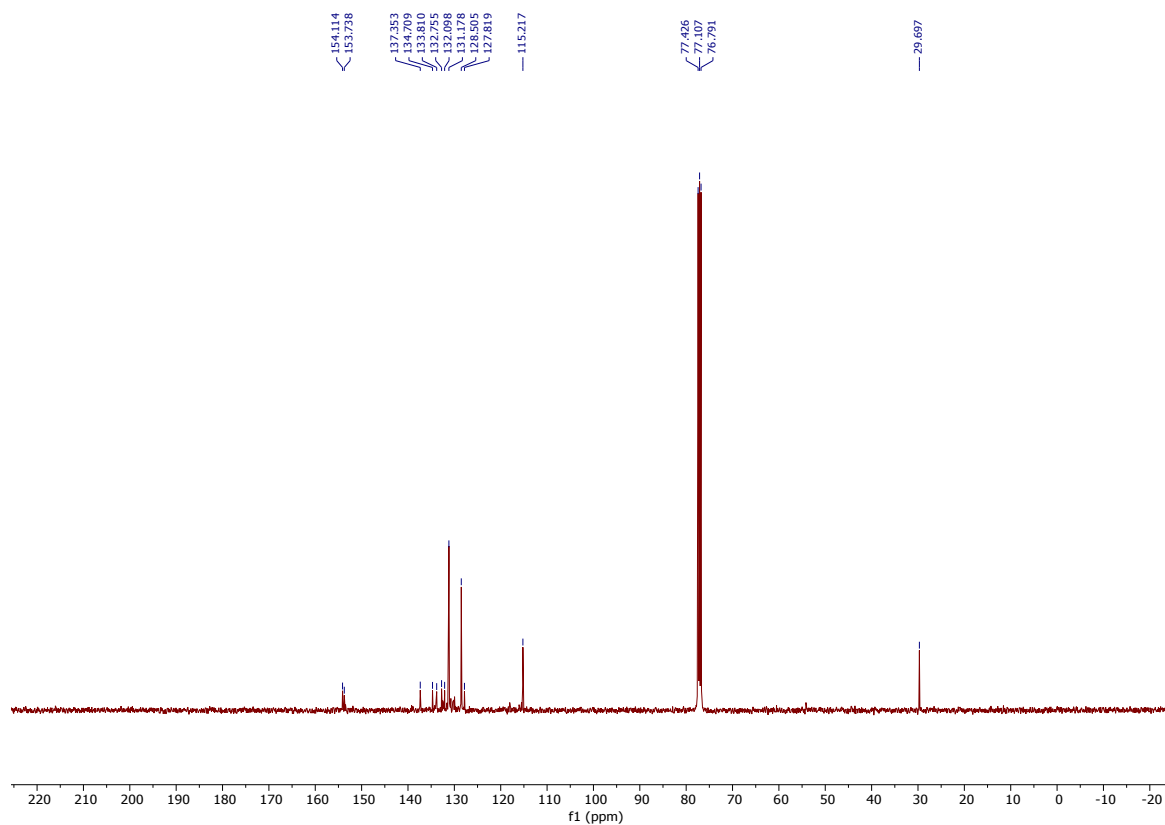

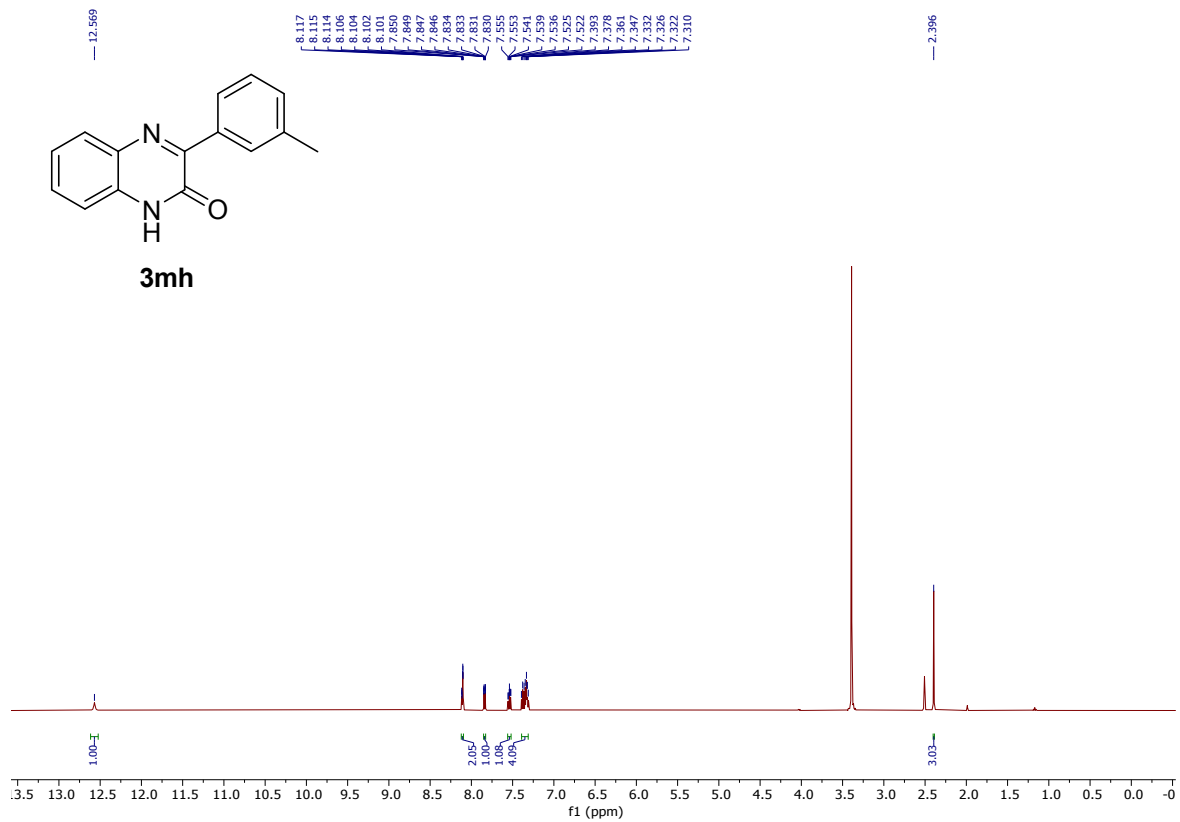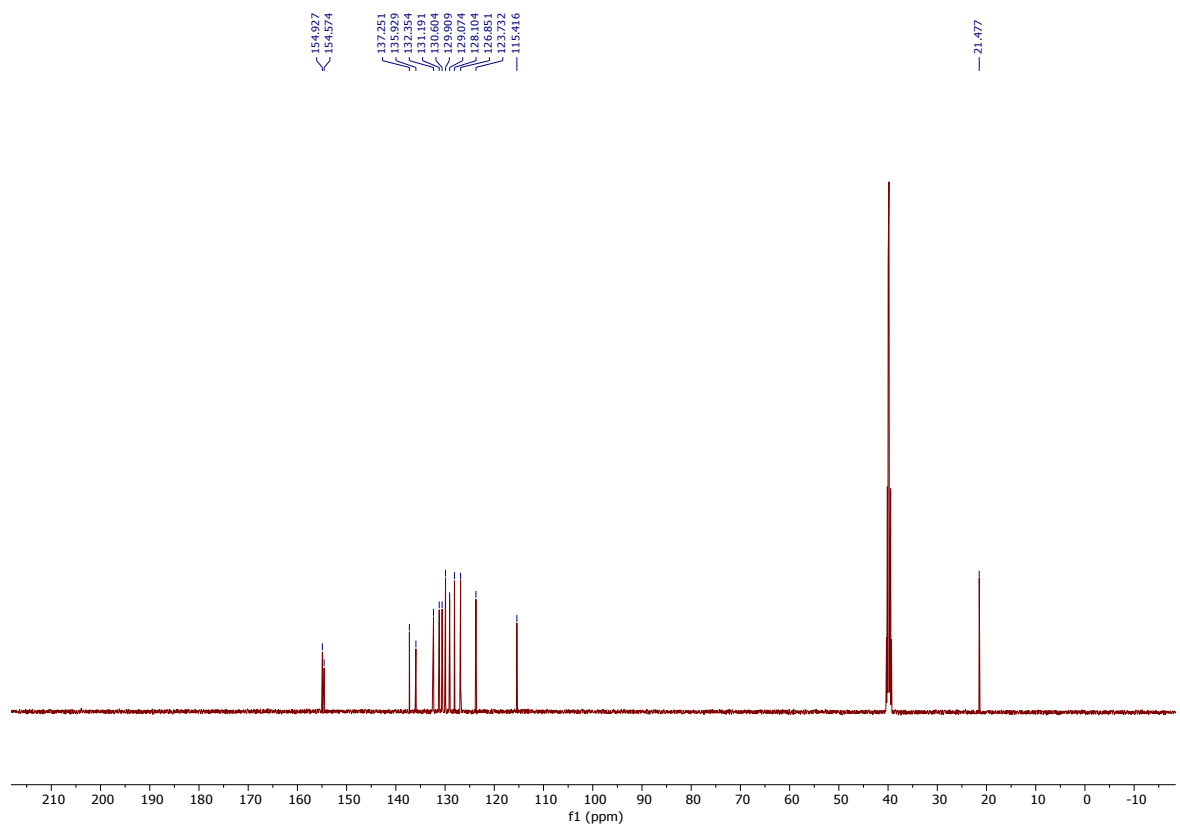

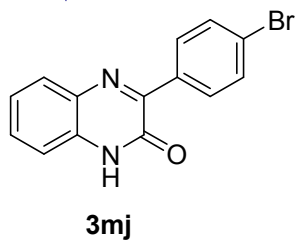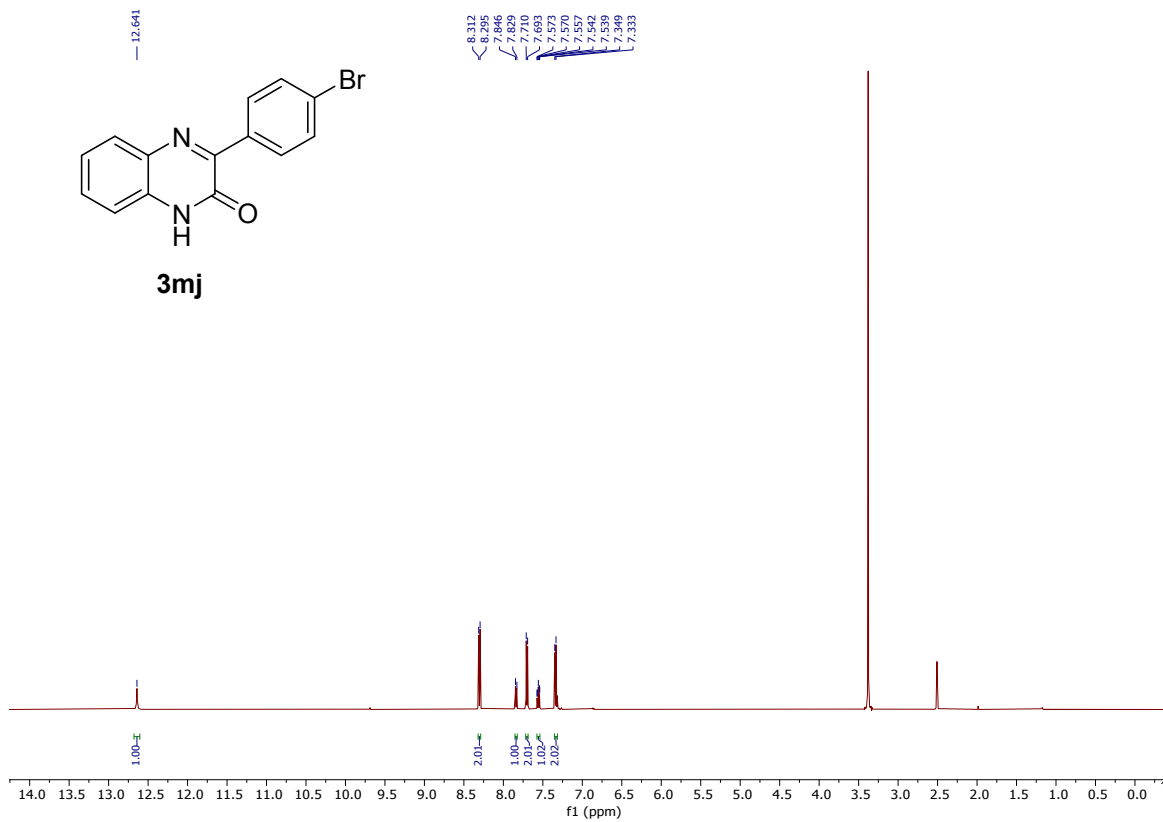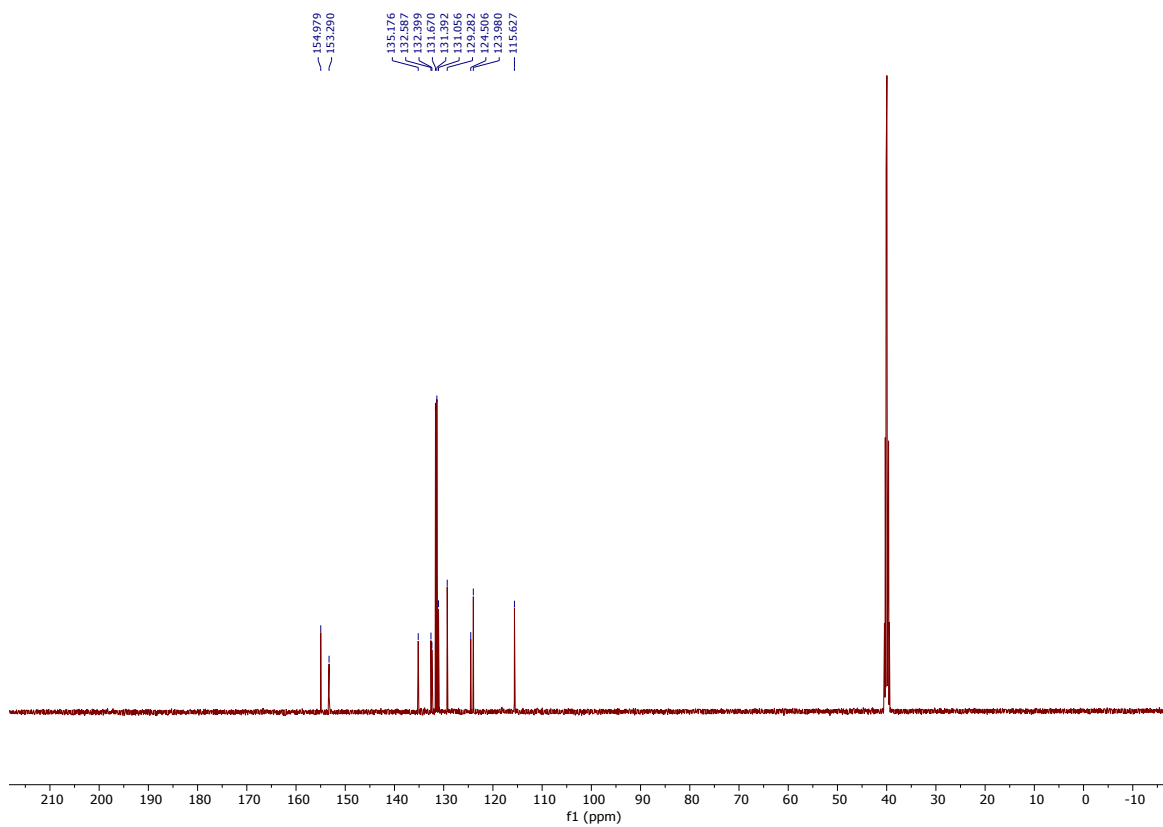

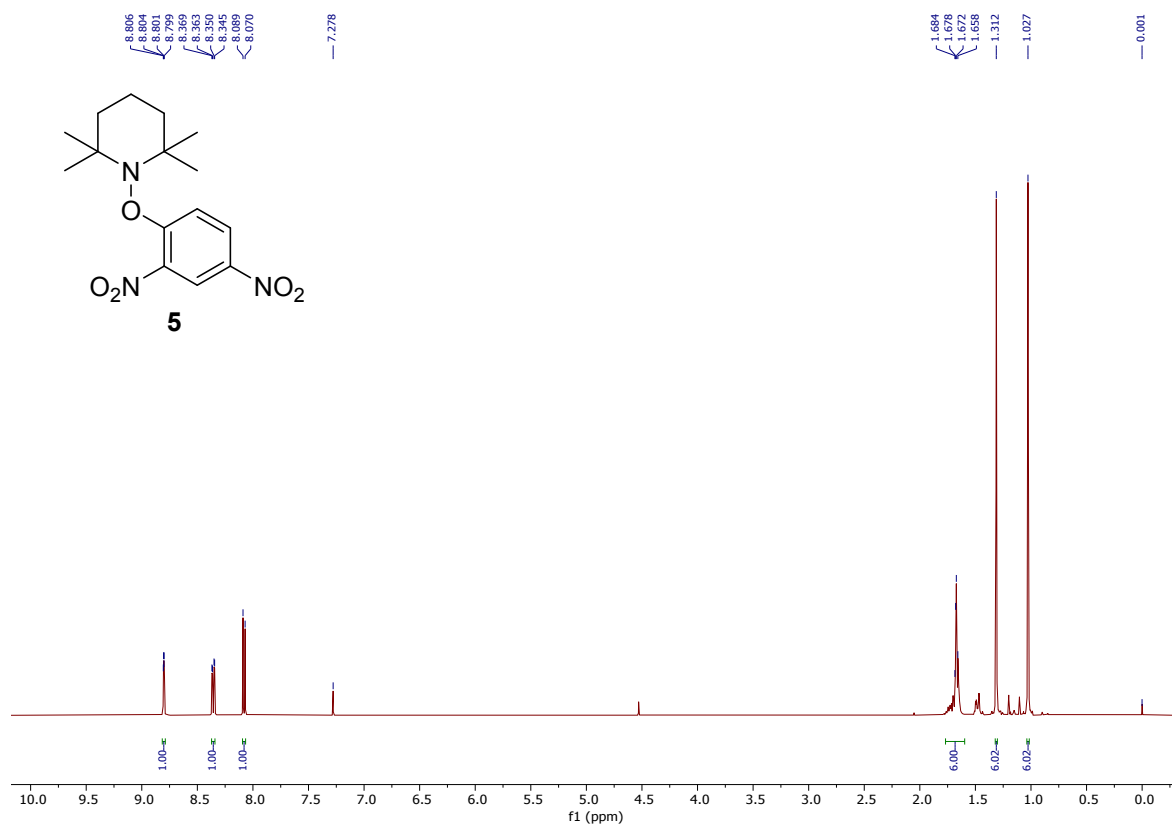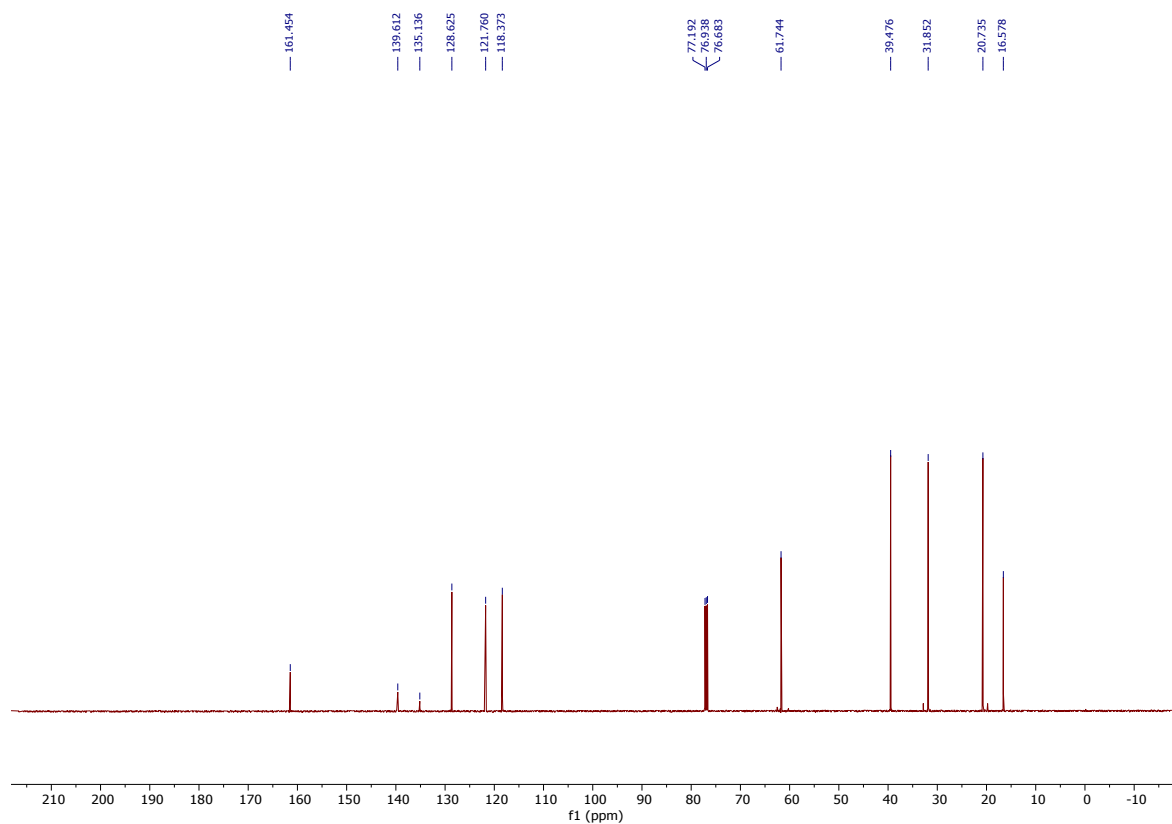

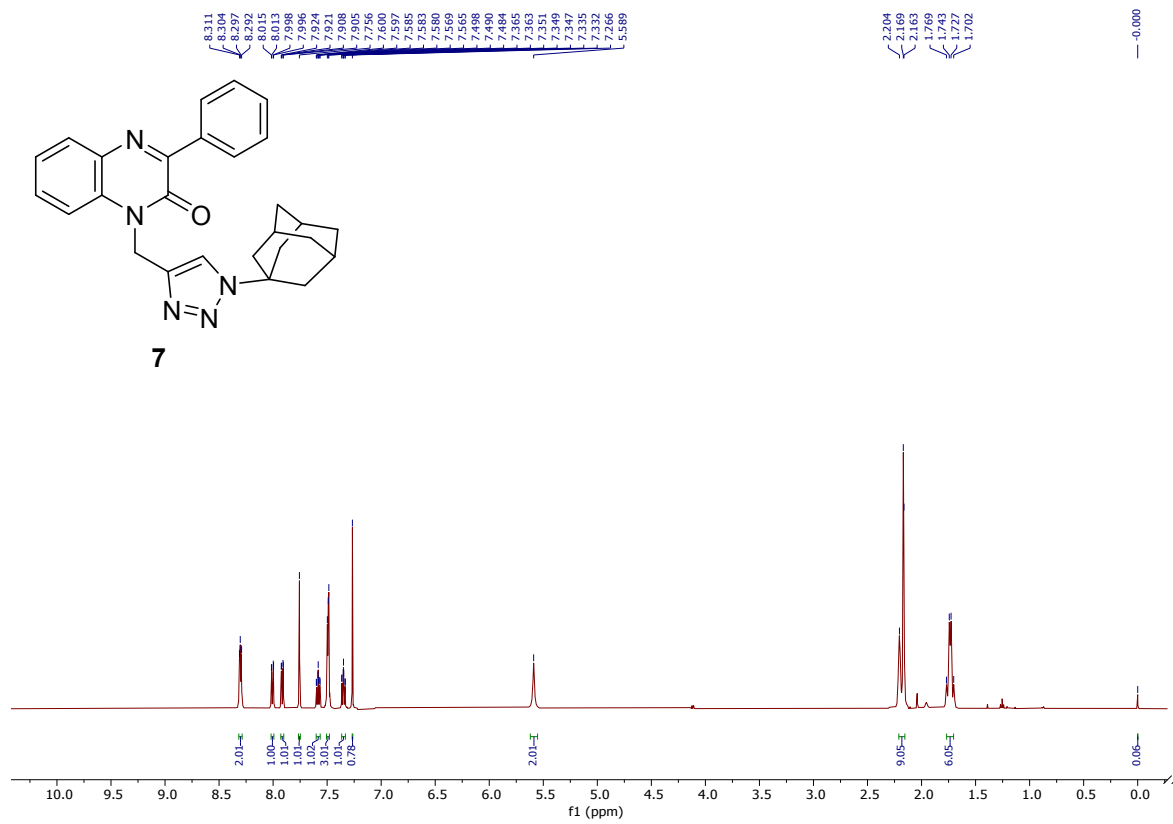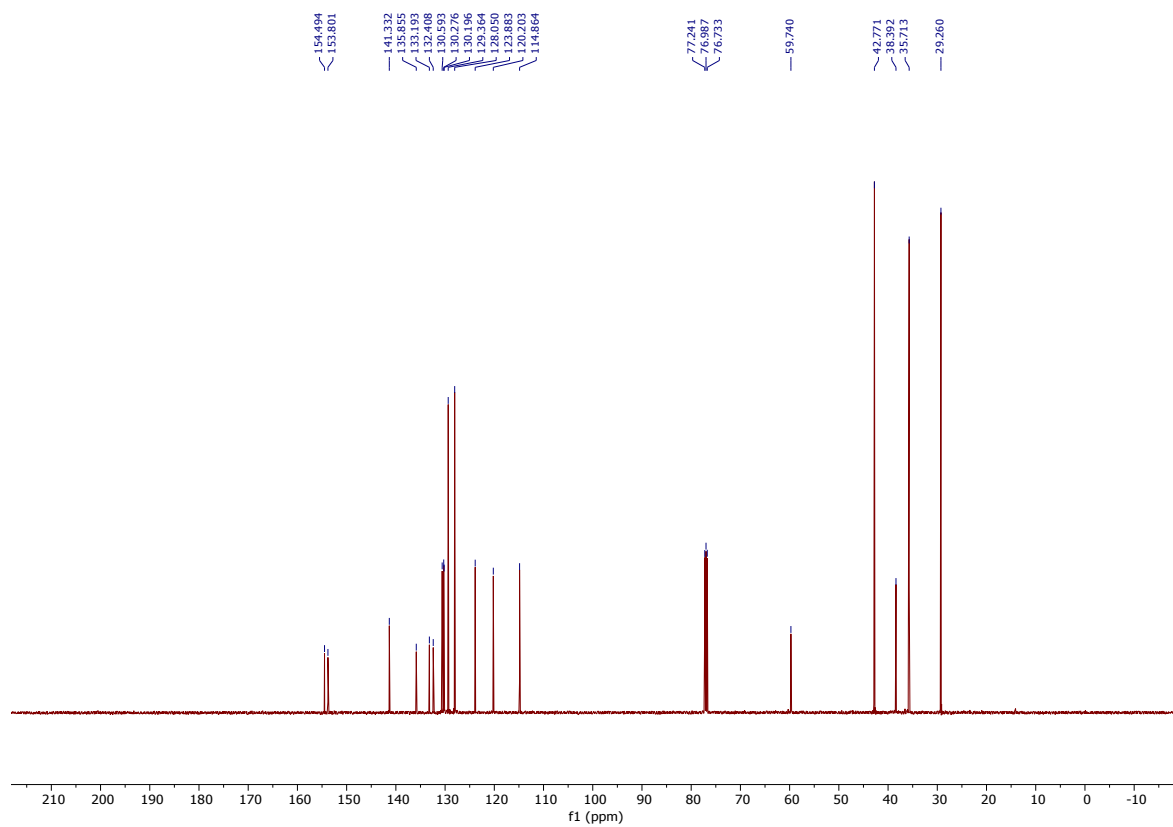

Supplement: d0ra00013b1.pdf [file d0ra00013b1.pdf]
